# Supplementary material for: Identification and pathogenicity of Alternaria species associated with leaf blotch disease and premature defoliation in French apple orchards
Source: PeerJ. 2021 Dec 1;9:e12496. doi: 10.7717/peerj.12496 (PMC8643104; doi:10.7717/peerj.12496)
Supplement: Supplemental Information 1 — Accessions in bold and red indicate the sequences that were submitted to Genbank. Accessions in blue indicate that the isolate has the same sequence that the one submitted (indicated in red) to Genbank. In the column pathogenicity, √ indicates the isolates for which Koch’s postulates were assessed by re-isolation and re-sequencing. In the column AMT1/AMT2/AMT14, 0 = no PCR amplification of the target gene, 1 = positive amplification of the target gene, - = not tested. [file peerj-09-12496-s001.xlsx]

## Sheet: Supplementary table S1
List and characteristics of isolates used in this study.
Accessions in bold and red indicate the sequences that were submitted to Genbank.
Accessions in blue indicate that the isolate has the same sequence that the one submitted (indicated in red) to Genbank.
In the column pathogenicity, √ indicates the isolates for which Koch’s postulates were assessed by re-isolation and re-sequencing.
In the column AMT1/AMT2/AMT14, 0 = no PCR amplification of the target gene, 1 = positive amplification of the target gene, - = not tested.
Isolate/Strain	Other identification	Source	Host (Cultivar)	Isolation matrix	Year	Country (locality)	Region (French isolates)	Alta-1 Genbank ID	EndoPG Genbank ID	OPA10-2 Genbank ID	Taxonomic identification with Alta-1 / EndoPg	Taxonomic identification with Alta-1 / EndoPg / OPA 10-2	Pathogenicity (Koch postulates)	AMT-1 /AMT-2/ AMT-14	Reference
16_17Pomme1	-	ANSES	Malus domestica (Pink Lady)	Fruit	2017	France	PACA	MN975275	MN975298	-	A. arborescens SC	A. arborescens SC	-	0 / 0 / -	This study
16_17Pomme2	-	ANSES	Malus domestica (Pink Lady)	Fruit	2017	France	PACA	MN975282	MN975305	MN975337	A. arborescens SC	A. arborescens SC	√	0 / 0 / -	This study
16_17Pomme4	-	ANSES	Malus domestica (Pink Lady)	Fruit	2017	France	PACA	MN975275	MN975298	-	A. alternata	-	-	0 / 0 / -	This study
16_489a3b	-	ANSES	Malus domestica (Braeburn)	Leaf	2016	France	ARA	MN975269	MN975299	MN975338	A. arborescens SC	A. arborescens SC	√	0 / 0 / 0	This study
16_489a5	-	ANSES	Malus domestica (Braeburn)	Leaf	2016	France	ARA	MN975270	MN975298	MN975324	A. alternata	A. alternata	-	0 / 0 / 0	This study
16_489a5x	-	ANSES	Malus domestica (Braeburn)	Leaf	2016	France	ARA	MN975270	MN975298	MN975324	A. alternata	A. alternata	-	0 / 0 / -	This study
16_489a5y	-	ANSES	Malus domestica (Braeburn)	Leaf	2016	France	ARA	MN975270	MN975298	-	A. alternata	-	-	0 / 0 / -	This study
16_489b	-	ANSES	Malus domestica (Braeburn)	Leaf	2016	France	ARA	MN975277	MN975305	MN975325	A. arborescens SC	A. arborescens SC	-	0 / 0 / 0	This study
16_489b2b	-	ANSES	Malus domestica (Braeburn)	Leaf	2016	France	ARA	MN975270	MN975298	-	A. alternata	-	-	0 / 0 / -	This study
16_489b3a	-	ANSES	Malus domestica (Braeburn)	Leaf	2016	France	ARA	MN975269	MN975299	MN975318	A. arborescens SC	A. arborescens SC	√	0 / 0 / 0	This study
16_490a2	-	ANSES	Malus domestica (Gala)	Leaf	2016	France	ARA	MN975270	MN975298	MN975324	A. alternata	A. alternata	-	0 / 0 / 0	This study
16_490b2a	-	ANSES	Malus domestica (Gala)	Leaf	2016	France	ARA	MN975276	MN975298	-	A. alternata	-	-	0 / 0 / -	This study
16_490b4a	-	ANSES	Malus domestica (Gala)	Leaf	2016	France	ARA	MN975269	MN975299	MN975325	A. arborescens SC	A. arborescens SC	√	0 / 0 / -	This study
16_491a3a	-	ANSES	Malus domestica (Gala)	Leaf	2016	France	ARA	MN975269	MN975306	MN975318	A. arborescens SC	A. arborescens SC	√	0 / 0 / 0	This study
16_497b2b	-	ANSES	Malus domestica (Gala)	Leaf	2016	France	ARA	MN975270	MN975298	MN975332	A. alternata	A. alternata	-	0 / 0 / -	This study
16_497b2c	-	ANSES	Malus domestica (Gala)	Leaf	2016	France	ARA	MN975290	MN975305	MN975338	A. arborescens SC	A. arborescens SC	√	0 / 0 / 0	This study
16_497ba	-	ANSES	Malus domestica (Gala)	Leaf	2016	France	ARA	MN975269	MN975305	MN975325	A. arborescens SC	A. arborescens SC	-	0 / 0 / -	This study
16_497bay	-	ANSES	Malus domestica (Gala)	Leaf	2016	France	ARA	MN975269	MN975305	MN975325	A. arborescens SC	A. arborescens SC	√	0 / 0 / 0	This study
16_497bc	-	ANSES	Malus domestica (Gala)	Leaf	2016	France	ARA	MN975276	MN975298	MN975332	A. alternata	A. alternata	√	0 / 0 / 0	This study
17_293a	-	ANSES	Malus domestica (Rosy Glow)	Leaf	2017	France	OCC	MN975270	MN975298	-	A. alternata	-	-	0 / 0 / -	This study
17_293b	-	ANSES	Malus domestica (Rosy Glow)	Leaf	2017	France	OCC	MN975288	MN975305	MN975340	A. arborescens SC	A. arborescens SC	-	0 / 0 / -	This study
17_293c	-	ANSES	Malus domestica (Rosy Glow)	Leaf	2017	France	OCC	MN975270	MN975298	-	A. alternata	-	-	0 / 0 / -	This study
17_294a1	-	ANSES	Malus domestica (Rosy Glow)	Leaf	2017	France	OCC	MN975269	MN975305	-	A. arborescens SC	-	-	0 / 0 / -	This study
17_294a3	-	ANSES	Malus domestica (Rosy Glow)	Leaf	2017	France	OCC	MN975277	MN975305	MN975325	A. arborescens SC	A. arborescens SC	√	0 / 0 / 0	This study
17_294b3	-	ANSES	Malus domestica (Rosy Glow)	Leaf	2017	France	OCC	MN975269	MN975306	MN975318	A. arborescens SC	A. arborescens SC	√	0 / 0 / 0	This study
17_368f	-	ANSES	Malus domestica (Golden)	Leaf	2017	France	ARA	MN975269	MN975305	-	A. arborescens SC	-	-	0 / 0 / -	This study
17_368k	-	ANSES	Malus domestica (Golden)	Leaf	2017	France	ARA	MN975269	MN975305	-	A. arborescens SC	-	-	0 / 0 / -	This study
17_369_SE1b	-	ANSES	Malus domestica (Reinette Grise)	Leaf	2017	France	ARA	MN975293	MN975315	-	A. arborescens SC	-	-	0 / 0 / -	This study
17_370a	-	ANSES	Malus domestica (Gala)	Leaf	2017	France	ARA	MN975269	MN975305	-	A. arborescens SC	-	-	0 / 0 / -	This study
17_370c	-	ANSES	Malus domestica (Gala)	Leaf	2017	France	ARA	MN975269	MN975305	-	A. arborescens SC	-	-	0 / 0 / -	This study
17_371a	-	ANSES	Malus domestica (Canada)	Leaf	2017	France	ARA	MN975275	MN975298	-	A. alternata	-	-	0 / 0 / -	This study
17_372b	-	ANSES	Malus domestica (Belchard)	Leaf	2017	France	ARA	MN975275	MN975298	-	A. alternata	-	-	0 / 0 / -	This study
17_372g	-	ANSES	Malus domestica (Belchard)	Leaf	2017	France	ARA	MN975269	MN975305	-	A. arborescens SC	-	-	0 / 0 / -	This study
17_373f	-	ANSES	Malus domestica (Golden)	Leaf	2017	France	ARA	MN975277	MN975305	-	A. arborescens SC	-	-	0 / 0 / -	This study
17_374e2	-	ANSES	Malus domestica (Gala)	Leaf	2017	France	ARA	MN975277	MN975305	-	A. arborescens SC	-	-	0 / 0 / -	This study
17_375b	-	ANSES	Malus domestica (Braeburn)	Leaf	2017	France	ARA	MN975269	MN975299	-	A. arborescens SC	-	-	0 / 0 / -	This study
17_376a	-	ANSES	Malus domestica (Gala)	Leaf	2017	France	ARA	MN975269	MN975299	-	A. arborescens SC	-	-	0 / 0 / -	This study
17_376d	-	ANSES	Malus domestica (Gala)	Leaf	2017	France	ARA	MN975269	MN975299	-	A. arborescens SC	-	-	0 / 0 / -	This study
17_377b	-	ANSES	Malus domestica (Dalinette)	Leaf	2017	France	ARA	MN975269	MN975299	-	A. arborescens SC	-	-	0 / 0 / -	This study
17_377d	-	ANSES	Malus domestica (Dalinette)	Leaf	2017	France	ARA	MN975270	MN975298	-	A. alternata	-	-	0 / 0 / -	This study
17_378a	-	ANSES	Malus domestica (Crimson)	Leaf	2017	France	ARA	MN975271	MN975298	-	A. alternata	-	-	0 / 0 / -	This study
17_378i	-	ANSES	Malus domestica (Crimson)	Leaf	2017	France	ARA	MN975275	MN975298	-	A. alternata	-	-	0 / 0 / -	This study
17_520	-	ANSES	Pyrus sp.	Fruit	2017	China	-	MN975275	MN975307	MN975319	A. alternata	A. alternata	√	0 / 0 / -	This study
18_271	-	ANSES	Malus domestica (Canada grise)	Leaf	2018	France	ARA	MN975275	MN975298	MN975333	A. alternata	A. alternata	-	0 / 0 / -	This study
18_290_2b	-	ANSES	Malus domestica (Golden delicious)	Leaf	2018	France	PACA	MN975270	MN975298	-	A. alternata	-	-	0 / 0 / -	This study
18_290_2c	-	ANSES	Malus domestica (Golden delicious)	Leaf	2018	France	PACA	MN975269	MN975305	-	A. arborescens SC	-	-	0 / 0 / -	This study
18_290_2e	-	ANSES	Malus domestica (Golden delicious)	Leaf	2018	France	PACA	MN975270	MN975298	MN975332	A. alternata	A. alternata	-	0 / 0 / -	This study
18_401_1_4	-	ANSES	Malus domestica (Golden)	Leaf	2018	France	PACA	MN975269	-	-	A. arborescens SC	-	-	0 / 0 / 0	This study
18_401_3_3	-	ANSES	Malus domestica (Golden)	Leaf	2018	France	PACA	MN975269	MN975305	-	A. arborescens SC	-	-	0 / 0 / 0	This study
18_401_6_1	-	ANSES	Malus domestica (Golden)	Leaf	2018	France	PACA	MN975269	MN975305	-	A. arborescens SC	-	-	0 / 0 / 0	This study
18_412_10a	-	ANSES	Malus domestica (Golden)	Leaf	2018	France	PACA	MN975271	MN975298	MN975333	A. alternata	A. alternata	-	- / - / -	This study
18_412_12b	-	ANSES	Malus domestica (Golden)	Leaf	2018	France	PACA	MN975269	MN975305	-	A. arborescens SC	-	-	- / - / -	This study
18_412_5a	-	ANSES	Malus domestica (Golden)	Leaf	2018	France	PACA	MN975269	MN975317	MN975325	A. arborescens SC	A. arborescens SC	-	- / - / -	This study
18_436_2A	-	ANSES	Malus domestica (Gala)	Leaf	2018	France	ARA	MN975269	MN975305	-	A. arborescens SC	-	-	0 / 0 / 0	This study
18_437_11A	-	ANSES	Malus domestica (Golden)	Leaf	2018	France	ARA	MN975269	MN975305	-	A. arborescens SC	-	-	0 / 0 / 0	This study
18_437_3C	-	ANSES	Malus domestica (Golden)	Leaf	2018	France	ARA	MN975269	MN975305	-	A. arborescens SC	-	-	0 / 0 / 0	This study
18_437_6B	-	ANSES	Malus domestica (Golden)	Leaf	2018	France	ARA	MN975270	MN975298	-	A. alternata	-	-	0 / 0 / 0	This study
18_438_10A	-	ANSES	Malus domestica (Reinette du canada)	Leaf	2018	France	ARA	MN975269	MN975305	-	A. arborescens SC	-	-	0 / 0 / 0	This study
18_438_11A	-	ANSES	Malus domestica (Reinette du canada)	Leaf	2018	France	ARA	MN975269	MN975299	-	A. arborescens SC	-	-	0 / 0 / 0	This study
18_438_1A	-	ANSES	Malus domestica (Reinette du canada)	Leaf	2018	France	ARA	MN975269	MN975305	-	A. arborescens SC	-	-	0 / 0 / 0	This study
18_439_1B1	-	ANSES	Malus domestica (Dalinette)	Leaf	2018	France	ARA	MN975269	MN975305	-	A. arborescens SC	-	-	0 / 0 / -	This study
18_439_2C	-	ANSES	Malus domestica (Dalinette)	Leaf	2018	France	ARA	MN975271	MN975298	-	A. alternata	-	-	- / - / -	This study
18_439_4A	-	ANSES	Malus domestica (Dalinette)	Leaf	2018	France	ARA	MN975297	MN975298	-	A. alternata	-	-	- / - / -	This study
18_440_1a	-	ANSES	Malus domestica (Crimson Crisp)	Leaf	2018	France	ARA	MN975270	MN975298	-	A. alternata	-	-	- / - / -	This study
18_440_1c	-	ANSES	Malus domestica (Crimson Crisp)	Leaf	2018	France	ARA	MN975288	MN975305	-	A. arborescens SC	-	-	- / - / -	This study
18_440_4a	-	ANSES	Malus domestica (Crimson Crisp)	Leaf	2018	France	ARA	MN975270	MN975298	-	A. alternata	-	-	- / - / -	This study
18_441_1_1	-	ANSES	Malus domestica (Gala)	Leaf	2018	France	ARA	MN975269	MN975305	-	A. arborescens SC	-	-	0 / 0 / 0	This study
18_441_5_2	-	ANSES	Malus domestica (Gala)	Leaf	2018	France	ARA	MN975269	MN975305	-	A. arborescens SC	-	-	0 / 0 / 0	This study
18_441_5_4	-	ANSES	Malus domestica (Gala)	Leaf	2018	France	ARA	MN975271	MN975298	-	A. alternata	-	-	0 / 0 / 0	This study
18_442_11_2	-	ANSES	Malus domestica (Canada)	Leaf	2018	France	ARA	MN975277	MN975305	-	A. arborescens SC	-	-	0 / 0 / 0	This study
18_442_7_1	-	ANSES	Malus domestica (Canada)	Leaf	2018	France	ARA	MN975270	MN975298	-	A. alternata	-	-	0 / 0 / 0	This study
18_442_X3	-	ANSES	Malus domestica (Canada)	Leaf	2018	France	ARA	MN975269	MN975305	-	A. arborescens SC	-	-	0 / 0 / 0	This study
18_443_11A	-	ANSES	Malus domestica (Golden)	Leaf	2018	France	ARA	MN975269	MN975305	-	A. arborescens SC	-	-	0 / 0 / 0	This study
18_443_4A	-	ANSES	Malus domestica (Golden)	Leaf	2018	France	ARA	MN975296	MN975315	-	A. alternata	-	-	0 / 0 / 0	This study
18_443_6B	-	ANSES	Malus domestica (Golden)	Leaf	2018	France	ARA	MN975269	MN975305	-	A. arborescens SC	-	-	0 / 0 / 0	This study
18_462_A2F	-	ANSES	Malus domestica (Pink Lady)	Leaf	2018	France	PACA	MN975275	MN975298	-	A. alternata	-	-	0 / 0 / 0	This study
18_462_F2F	-	ANSES	Malus domestica (Pink Lady)	Leaf	2018	France	PACA	MN975270	MN975298	-	A. alternata	-	-	0 / 0 / 0	This study
18_462_G2F	-	ANSES	Malus domestica (Pink Lady)	Leaf	2018	France	PACA	MN975276	MN975298	-	A. alternata	-	-	0 / 0 / 0	This study
18_534_11B	-	ANSES	Malus domestica (Pink Lady)	Leaf	2018	France	PACA	MN975269	MN975305	-	A. arborescens SC	-	-	- / - / -	This study
18_534_1A	-	ANSES	Malus domestica (Pink Lady)	Leaf	2018	France	PACA	MN975270	MN975298	-	A. alternata	-	-	0 / 0 / 0	This study
18_534_4B	-	ANSES	Malus domestica (Pink Lady)	Leaf	2018	France	PACA	MN975276	MN975298	-	A. alternata	-	-	0 / 0 / 0	This study
18_534_A1A	-	ANSES	Malus domestica (Pink Lady)	Fruit	2018	France	PACA	MN975270	MN975298	-	A. alternata	-	-	0 / 0 / 0	This study
18_534_K2	-	ANSES	Malus domestica (Pink Lady)	Fruit	2018	France	PACA	MN975269	MN975306	-	A. arborescens SC	-	-	0 / 0 / 0	This study
18_534_L3	-	ANSES	Malus domestica (Pink Lady)	Fruit	2018	France	PACA	MN975269	MN975299	-	A. arborescens SC	-	-	0 / 0 / 0	This study
1Fr	-	MC	Malus domestica (Golden delicious)	Fruit	2007	Italy (Veneto)	-	MN975270	MN975304	-	A. alternata	-	-	0 / 0 / 0	This study
21_17Pomme3	-	ANSES	Malus domestica (Galastar)	Fruit	2017	France	OCC	MN975276	MN975298	-	A. alternata	-	-	0 / 0 / -	This study
21_17Pomme4_2	-	ANSES	Malus domestica (Galastar)	Fruit	2017	France	OCC	MN975276	MN975298	MN975332	A. alternata	A. alternata	√	0 / 0 / -	This study
26FrA	-	MC	Malus domestica (Golden delicious)	Fruit	2008	Italy (Veneto)	-	MN975275	MN975298	MN975332	A. alternata	A. alternata	-	0 / 0 / 0	Rotondo et al. (2012)
28FrA_13_12	-	MC	Malus domestica (Golden delicious)	Fruit	2008	Italy (Veneto)	-	MN975270	MN975304	-	A. alternata	-	-	0 / 0 / 0	This study
3_18alt2	-	ANSES	Malus domestica (Pink Lady)	Fruit	2017	France	PACA	MN975270	MN975298	MN975324	A. alternata	A. alternata	-	- / - / -	This study
34FrB_13_12	-	MC	Malus domestica (Golden delicious)	Fruit	2009	Italy (Verona)	-	MN975269	MN975305	-	A. arborescens SC	-	-	0 / 0 / 0	This study
36Fr_13_12	-	MC	Malus domestica (Golden delicious)	Fruit	2009	Italy (Veneto)	-	MN975270	MN975304	-	A. alternata	-	-	0 / 0 / 0	This study
44Fg_13_12	-	MC	Malus domestica (Cripps pink)	Leaf	2010	Italy (Emilia-Romagna)	-	MN975288	MN975305	-	A. arborescens SC	-	-	0 / 0 / 0	This study
58Fg1	-	MC	Malus domestica (Golden delicious)	Leaf	2017	Italy (Emilia-Romagna)	-	MN975270	MN975309	-	A. alternata	-	-	0 / 0 / -	This study
Abra43	-	TG	Raphanus sp. (seeds)	-	2001	France	-	-	-	-	-	-	√	- / - / -	This study
AP1003	-	AP	Malus domestica	Fruit	2016	Argentina	-	MN975270	MN975298	-	-	-	-	0 / 0 / 0	This study
AP1008	-	AP	Malus domestica	Fruit	2016	Argentina	-	MN975270	MN975304	MN975336	A. alternata	A. alternata	-	0 / 0 / 0	This study
AP1016	-	AP	Malus domestica	Fruit	2016	Argentina	-	MN975287	MN975304	MN975332	A. alternata	A. alternata	-	0 / 0 / 0	This study
AP1023	-	AP	Malus domestica	Fruit	2016	Argentina	-	MN975270	MN975304	-	A. alternata	-	-	0 / 0 / 0	This study
BMP2150	CR-1	BP	Malus domestica	Fruit	2005	South Africa	-	MN975277	MN975299	MN975325	A. arborescens SC	A. arborescens SC	-	0 / 0 / 0	This study
BMP2152	CR-3	BP	Malus domestica	Fruit	2005	South Africa	-	MN975269	MN975305	-	A. arborescens SC	-	-	0 / 0 / 0	This study
BMP2155	CR-6	BP	Malus domestica	Fruit	2005	South Africa	-	MN975269	MN975305	-	A. arborescens SC	-	-	0 / 0 / 0	This study
BMP2167	CR-17	BP	Malus domestica	Fruit	2005	South Africa	-	MN975270	MN975298	-	A. alternata	-	-	0 / 0 / 0	This study
BMP2168	CR-18	BP	Malus domestica	Fruit	2005	South Africa	-	MN975275	MN975312	MN975333	A. alternata	A. alternata	-	0 / 0 / 0	This study
BMP2169	CR-19	BP	Malus domestica	Fruit	2005	South Africa	-	MN975270	MN975298	-	A. alternata	-	-	0 / 0 / 0	This study
BMP2170	CR-20	BP	Malus domestica	Fruit	2005	South Africa	-	MN975270	MN975298	MN975327	A. alternata	A. alternata	-	0 / 0 / 0	This study
BMP2174	CR-22	BP	Malus domestica	Fruit	2005	South Africa	-	MN975270	MN975298	-	A. alternata	-	-	0 / 0 / 0	This study
BMP2787	AP009	BP	Malus domestica	Fruit	2008	Australia	-	MN975269	MN975305	-	A. arborescens SC	-	-	0 / 0 / 0	This study
BMP2791	AP034	BP	Malus domestica	Fruit	2008	Australia	-	MN975269	MN975299	-	A. arborescens SC	-	-	0 / 0 / 0	This study
BMP2794	WA46461	BP	Malus domestica	Fruit	2008	Australia	-	MN975269	MN975305	-	A. arborescens SC	-	-	0 / 0 / 0	This study
BMP2795	WA46495	BP	Malus domestica	Fruit	2008	Australia	-	MN975269	MN975299	-	A. arborescens SC	-	-	0 / 0 / 0	This study
BMP2797	WA46469	BP	Malus domestica	Fruit	2008	Australia	-	MN975269	MN975305	-	A. arborescens SC	-	-	0 / 0 / 0	This study
8FgB	BMP3448	BP	Malus domestica (Gala)	Leaf	2007	Italy (Veneto)	-	MN975289	MN975305	MN975335	A. arborescens SC	A. arborescens SC	-	0 / 0 / 0	Rotondo et al. (2012)
10FgB	BMP3451	BP	Malus domestica (Golden)	Leaf	2007	Italy(Veneto)	-	MN975269	MN975305	-	A. arborescens SC	-	-	0 / 0 / 0	Rotondo et al. (2012)
14Fg	BMP3452	BP	Malus domestica (Gala)	Leaf	2007	Italy (Emilia-Romagna)	-	MN975289	MN975305	MN975318	A. arborescens SC	A. arborescens SC	-	0 / 0 / 0	Rotondo et al. (2012)
25FrA2	BMP3460	BP	Malus domestica (Golden)	Fruit	2007	Italy (Trentino-Alto-Adige)	-	MN975288	MN975305	-	A. arborescens SC	-	-	0 / 0 / 0	Rotondo et al. (2012)
36Fg	BMP3463	BP	Malus domestica (Golden)	Leaf	2009	Italy (Veneto)	-	MN975269	MN975298	-	A. alternata	-	-	0 / 0 / 0	Rotondo et al. (2012)
A152	BMP3472	BP	Malus domestica (Golden)	Fruit	2007	Italy(Trentino-Alto-Adige)	-	MN975270	MN975298	-	A. alternata	-	-	0 / 0 / 0	Rotondo et al. (2012)
10BZ3	BMP3478	BP	Malus domestica (Golden)	Fruit	2008	Italy(Trentino-Alto-Adige)	-	MN975269	MN975299	-	A. arborescens SC	-	-	0 / 0 / 0	Rotondo et al. (2012)
BRIP46356	-	OA	Malus domestica (Fuji)	Fruit	2005	Australia (Queensland)	-	MN975283	MN975304	MN975334	A. alternata	A. alternata	-	0 / 0 / 0	Harteveld et al. (2013)
BRIP46361	-	OA	Malus domestica (Royal Gala)	Leaf	2005	Australia (New South Wales)	-	MN975270	MN975298	MN975332	A. alternata	A. alternata	√	0 / 0 / -	Harteveld et al. (2013)
BRIP46395	-	OA	Malus domestica	Leaf	2005	Australia (New South Wales)	-	MN975270	MN975309	MN975332	A. alternata	A. alternata	-	0 / 0 / -	Harteveld et al. (2013)
BRIP46399	-	OA	Malus domestica	Fruit	2005	Australia (New South Wales)	-	MN975270	MN975304	MN975332	A. alternata	A. alternata	-	0 / 0 / -	Harteveld et al. (2013)
BRIP46455	-	OA	Malus domestica (Pink Lady)	Leaf	2005	Australia (Western Australia)	-	MN975275	MN975298	MN975333	A. alternata	A. alternata	-	0 / 0 / -	Harteveld et al. (2013)
BRIP46512	-	OA	Malus domestica (Pink Lady)	Leaf	2005	Australia (Western Australia)	-	MN975269	MN975305	MN975318	A. arborescens SC	A. arborescens SC	-	0 / 0 / -	Harteveld et al. (2013)
BRIP46550	-	OA	Malus domestica (Fuji)	Fruit	2005	Australia (Queensland)	-	MN975270	MN975310	MN975327	A. alternata	A. alternata	-	0 / 0 / -	Harteveld et al. (2013)
BRIP46574	-	OA	Malus domestica (Royal Gala)	Leaf	2005	Australia (South Australia)	-	MN975276	MN975298	MN975324	A. alternata	A. alternata	-	0 / 0 / -	Harteveld et al. (2013)
BRIP46656	-	OA	Malus domestica	Leaf	2005	Australia (Tasmania)	-	MN975270	MN975298	MN975324	A. alternata	A. alternata	√	0 / 0 / -	Harteveld et al. (2013)
BRIP46847	-	OA	Malus domestica (Jonagold)	Leaf	2005	Australia (Victoria)	-	MN975282	MN975311	MN975325	A. arborescens SC	A. arborescens SC	-	0 / 0 / -	Harteveld et al. (2013)
BRIP46872	-	OA	Malus domestica (Fuji)	Leaf	2005	Australia (Victoria)	-	MN975269	MN975306	MN975318	A. arborescens SC	A. arborescens SC	√	0 / 0 / -	Harteveld et al. (2013)
Canada1b	-	ANSES	Malus domestica (Canada)	Leaf	2017	France	NA	MN975270	MN975298	MN975324	A. alternata	A. alternata	-	0 / 0 / -	This study
Canada1d	-	ANSES	Malus domestica (Canada)	Leaf	2017	France	NA	MN975270	MN975298	-	A. alternata	-	-	0 / 0 / -	This study
CBS100.23	-	WI	Malus domestica	-	1923	-	-	MN975278	MN975302	MN975331	A. gossypina	A. gossypina	-	- / - / -	Woudenberg et al. (2015)
CBS107.53	-	WI	Pyrus pyrifolia	-	-	Japan	-	MN975280	MN975307	MN975319	A. alternata	A. alternata	-	- / - / -	Woudenberg et al. (2015)
CBS112633	-	WI	Malus domestica	-	-	South Africa	-	MN975269	MN975305	MN975330	A. arborescens SC	A. arborescens SC	-	- / - / -	Woudenberg et al. (2015)
CBS112749	-	WI	Malus domestica	-	-	South Africa	-	MN975277	MN975305	MN975325	A. arborescens SC	A. arborescens SC	-	- / - / -	Woudenberg et al. (2015)
CBS113013	-	WI	Malus domestica	-	-	South Africa	-	MN975270	MN975298	MN975327	A. alternata	A. alternata	-	- / - / -	Woudenberg et al. (2015)
CBS113014	-	WI	Malus domestica	-	-	South Africa	-	MN975270	MN975298	MN975324	A. alternata	A. alternata	-	- / - / -	Woudenberg et al. (2015)
CBS113015	-	WI	Malus domestica	-	-	South Africa	-	MN975270	MN975298	MN975324	A. alternata	A. alternata	-	- / - / -	Woudenberg et al. (2015)
CBS113054	-	WI	Malus domestica	-	-	South Africa	-	MN975270	MN975298	MN975329	A. alternata	A. alternata	-	- / - / -	Woudenberg et al. (2015)
CBS115069	-	WI	Malus domestica	-	-	South Africa	-	MN975270	MN975298	MN975324	A. alternata	A. alternata	-	- / - / -	Woudenberg et al. (2015)
CBS115516	-	WI	Malus domestica	-	-	South Africa	-	MN975269	MN975305	MN975326	A. arborescens SC	A. arborescens SC	-	- / - / -	Woudenberg et al. (2015)
CBS115517	-	WI	Malus domestica	-	-	South Africa	-	MN975279	MN975306	MN975325	A. arborescens SC	A. arborescens SC	-	- / - / -	Woudenberg et al. (2015)
CBS116329	-	WI	Malus domestica	-	-	Germany	-	MN975269	MN975305	MN975326	A. arborescens SC	A. arborescens SC	-	- / - / -	Woudenberg et al. (2015)
CBS117.44	EGS06.190	WI	Godetia sp.	Leaf	1942	Denmark	-	MN975276	MN975298	-	A. alternata	-	-	0 / 0 / -	This study
CBS118389	EGS90.131	WI	Pyrus pyrifolia	Fruit	1990	Japan	-	MN975269	MN975299	MN975325	A. arborescens SC	A. arborescens SC	√	0 / 0 / 0	Woudenberg et al. (2015)
CBS118488	EGS90.0391	WI	Pyrus pyrifolia	Fruit	1990	Japan	-	MN975272	MN975301	MN975320	A. gaisen	-	-	0 / 0 / -	Woudenberg et al. (2015)
CBS121547	EGS50.048	WI	Pyrus bretschneideri	-	2001	China	-	MN975270	MN975307	MN975328	A. alternata	A. alternata	-	- / - / -	Woudenberg et al. (2015)
CBS595.93	-	WI	Pyrus pyrifolia	Leaf	1990	Japan	-	MN975275	MN975307	MN975319	A. alternata	A. alternata	-	0 / 0 / -	Woudenberg et al. (2015)
CBS965.95	-	WI	Triticum sp.	Leaf	-	India	-	MN975270	MN975304	-	A. alternata	-	-	0 / 0 / -	This study
Crimpson1	-	ANSES	Malus domestica (Crimson)	Leaf	2018	France	ARA	MN975275	MN975314	-	A. alternata	-	-	0 / 0 / -	This study
Crimpson3	-	ANSES	Malus domestica (Crimson)	Leaf	2018	France	ARA	MN975270	MN975298	-	A. alternata	-	-	0 / 0 / -	This study
Crimpson4	-	ANSES	Malus domestica (Crimson)	Leaf	2018	France	ARA	MN975270	MN975298	-	A. alternata	-	-	0 / 0 / -	This study
Crimson9	-	ANSES	Malus domestica (Crimson)	Leaf	2018	France	ARA	MN975270	MN975298	-	A. alternata	-	-	0 / 0 / -	This study
Dalinette1	-	ANSES	Malus domestica (Dalinette)	Leaf	2018	France	ARA	MN975275	MN975298	-	A. alternata	-	-	0 / 0 / -	This study
Dalinette10	-	ANSES	Malus domestica (Dalinette)	Leaf	2018	France	ARA	MN975292	MN975316	MN975339	A. alternata	-	-	0 / 0 / -	This study
Dalinette11	-	ANSES	Malus domestica (Dalinette)	Leaf	2018	France	ARA	MN975275	MN975298	-	A. alternata	-	-	0 / 0 / -	This study
Dalinette14	-	ANSES	Malus domestica (Dalinette)	Leaf	2018	France	ARA	MN975276	MN975298	-	A. alternata	-	-	0 / 0 / -	This study
Dalinette2	-	ANSES	Malus domestica (Dalinette)	Leaf	2018	France	ARA	MN975270	MN975298	MN975333	A. alternata	A. alternata	-	0 / 0 / -	This study
Dalinette3	-	ANSES	Malus domestica (Dalinette)	Leaf	2018	France	ARA	MN975270	MN975298	-	A. alternata	-	-	0 / 0 / -	This study
Dalinette4	-	ANSES	Malus domestica (Dalinette)	Leaf	2018	France	ARA	MN975270	MN975298	-	A. alternata	-	-	0 / 0 / -	This study
Dalinette5	-	ANSES	Malus domestica (Dalinette)	Leaf	2018	France	ARA	MN975269	MN975305	-	A. arborescens SC	-	√	0 / 0 / -	This study
Dalinette6	-	ANSES	Malus domestica (Dalinette)	Leaf	2018	France	ARA	MN975270	MN975298	-	A. alternata	-	-	0 / 0 / -	This study
Dalinette7	-	ANSES	Malus domestica (Dalinette)	Leaf	2018	France	ARA	MN975270	MN975309	-	A. alternata	-	-	0 / 0 / -	This study
EGS30.033R	CBS540.94	WI	Nicotiana tabacum	-	1971	United States (North Carolina)	-	MN975273	MN975302	MN975321	A. alternata	-	-	- / - / -	This study
EGS34_015T	CBS918.96	WI	Dianthus chinensis	Leaf	1981	United Kingdom	-	MN975270	MN975298	MN975319	A. alternata	-	-	- / - / -	Armitage et al. (2015)
EGS34_016T	CBS115616	WI	Arachis hypogaea	-	1980	India	-	MN975270	MN975300	MN975324	A. alternata	-	-	- / - / -	Armitage et al. (2015)
EGS38_029T	CBS106.24	WI	Malus sylvestris	Fruit	1924	United States	-	MN975271	MN975298	MN975322	A. alternata	-	-	- / - / -	Armitage et al. (2015)
EGS39.128T	CBS102605	WI	Solanum lycopersicum	-	1990	United States (California)	-	MN975269	MN975299	MN975318	A. arborescens SC	-	-	0 / 0 / -	Armitage et al. (2015)
EGS50.116R	CBS118808	WI	Alstroemeria sp.	Leaf	2002	United States (California)	-	MN975274	MN975303	MN975323	A. alstroemeriae	-	-	- / - / -	This study
EGS90.512R	CBS632.93	WI	Pyrus pyrifolia	Fruit	1990	Japan	-	MN975272	MN975301	MN975320	A. gaisen	-	-	- / - / -	Armitage et al. (2015)
FERA1082	-	AA	Malus domestica	-	-	-	-	MN975281	MN975298	-	A. alternata	-	-	0 / 0 / 0	Armitage et al. (2015)
FERA1164	-	AA	Malus domestica	-	-	-	-	MN975271	MN975308	MN975332	A. alternata	A. alternata	-	0 / 0 / 0	Armitage et al. (2015)
FERA1165	-	AA	Malus domestica	-	-	-	-	MN975271	MN975304	MN975332	A. alternata	A. alternata	-	0 / 0 / 0	Armitage et al. (2015)
FERA1166	-	AA	Malus domestica	-	-	-	-	MN975270	MN975298	MN975332	A. alternata	A. alternata	-	1 / 1 / 1	Armitage et al. (2015)
FERA1177	-	AA	Malus domestica	-	-	-	-	MN975270	MN975304	MN975332	A. alternata	A. alternata	-	1 / 1 / 1	Armitage et al. (2015)
FERA1310	-	AA	Malus domestica	-	-	-	-	MN975271	MN975298	-	A. alternata	-	-	0 / 0 / 0	Armitage et al. (2015)
FERA24350	-	AA	Pyrus pyrifolia	-	-	-	-	MN975275	MN975298	-	A. alternata	-	-	0 / 0 / 0	Armitage et al. (2015)
FERA635	-	AA	Malus domestica	-	-	-	-	MN975275	MN975298	-	A. alternata	-	-	1 / 1 / 1	Armitage et al. (2015)
FERA648	-	AA	Pyrus sp.	-	-	-	-	MN975281	MN975298	MN975324	A. alternata	A. alternata	√	0 / 0 / 0	Armitage et al. (2015)
FERA650	-	AA	Pyrus sp.	-	-	-	-	MN975272	MN975301	MN975325	A. gaisen	Alternaria gaisen	-	0 / 0 / 1	Armitage et al. (2015)
FERA675	-	AA	Pyrus pyrifolia	-	-	-	-	MN975269	MN975305	MN975325	A. arborescens SC	A. arborescens SC	-	0 / 0 / 0	Armitage et al. (2015)
FERA743	-	AA	Malus domestica	-	-	-	-	MN975275	MN975298	MN975332	A. alternata	A. alternata	-	1 / 1 / 1	Armitage et al. (2015)
Garance2	-	ANSES	Malus domestica (Garance)	Leaf	2018	France	ARA	MN975275	MN975314	MN975333	A. alternata	A. alternata	-	0 / 0 / -	This study
Garance7	-	ANSES	Malus domestica (Garance)	Leaf	2018	France	ARA	MN975270	MN975298	-	A. alternata	-	-	0 / 0 / -	This study
Golden1	-	ANSES	Malus domestica (Golden)	Leaf	2017	France	PACA	MN975269	MN975306	-	A. arborescens SC	-	-	0 / 0 / -	This study
Golden1a	-	ANSES	Malus domestica (Golden)	Leaf	2017	France	PACA	MN975277	MN975305	-	A. arborescens SC	-	-	0 / 0 / -	This study
Golden1bis	-	ANSES	Malus domestica (Golden)	Leaf	2017	France	PACA	MN975270	MN975298	-	A. alternata	-	-	0 / 0 / -	This study
Golden1bis2	-	ANSES	Malus domestica (Golden)	Leaf	2017	France	PACA	MN975269	MN975305	-	A. arborescens SC	-	-	0 / 0 / -	This study
Golden1c	-	ANSES	Malus domestica (Golden)	Leaf	2017	France	PACA	MN975269	MN975305	-	A. arborescens SC	-	-	0 / 0 / -	This study
Golden1d	-	ANSES	Malus domestica (Golden)	Leaf	2017	France	PACA	MN975269	MN975305	-	A. arborescens SC	-	-	0 / 0 / -	This study
Golden1f	-	ANSES	Malus domestica (Golden)	Leaf	2017	France	PACA	MN975269	MN975305	-	A. arborescens SC	-	-	0 / 0 / -	This study
Golden1g	-	ANSES	Malus domestica (Golden)	Leaf	2017	France	PACA	MN975269	MN975305	-	A. arborescens SC	-	-	0 / 0 / -	This study
Golden1i	-	ANSES	Malus domestica (Golden)	Leaf	2017	France	PACA	MN975269	MN975306	-	A. arborescens SC	-	-	0 / 0 / -	This study
Golden1j	-	ANSES	Malus domestica (Golden)	Leaf	2017	France	PACA	MN975269	MN975306	-	A. arborescens SC	-	-	0 / 0 / -	This study
Golden2a	-	ANSES	Malus domestica (Golden)	Leaf	2017	France	PACA	MN975270	MN975298	-	A. alternata	-	-	0 / 0 / -	This study
Golden2b	-	ANSES	Malus domestica (Golden)	Leaf	2017	France	PACA	MN975269	MN975305	MN975326	A. arborescens SC	A. arborescens SC	√	0 / 0 / 0	This study
Golden2bis	-	ANSES	Malus domestica (Golden)	Leaf	2017	France	PACA	MN975269	MN975299	-	A. arborescens SC	-	-	0 / 0 / -	This study
Golden2bisb	-	ANSES	Malus domestica (Golden)	Leaf	2017	France	PACA	MN975269	MN975306	-	A. arborescens SC	-	-	0 / 0 / -	This study
Golden2c	-	ANSES	Malus domestica (Golden)	Leaf	2017	France	PACA	MN975269	MN975306	-	A. arborescens SC	-	-	0 / 0 / -	This study
Golden2d	-	ANSES	Malus domestica (Golden)	Leaf	2017	France	PACA	MN975291	MN975305	MN975325	A. arborescens SC	A. arborescens SC	√	0 / 0 / 0	This study
Golden2e	-	ANSES	Malus domestica (Golden)	Leaf	2017	France	PACA	MN975269	MN975305	-	A. arborescens SC	-	-	0 / 0 / -	This study
Golden2f	-	ANSES	Malus domestica (Golden)	Leaf	2017	France	PACA	MN975270	MN975298	-	A. alternata	-	-	0 / 0 / -	This study
Golden2g	-	ANSES	Malus domestica (Golden)	Leaf	2017	France	PACA	MN975269	MN975306	-	A. arborescens SC	-	-	0 / 0 / -	This study
Golden3a	-	ANSES	Malus domestica (Golden)	Leaf	2017	France	PACA	MN975269	MN975305	-	A. arborescens SC	-	-	0 / 0 / -	This study
Golden3abisa	-	ANSES	Malus domestica (Golden)	Leaf	2017	France	PACA	MN975269	MN975306	-	A. arborescens SC	-	-	0 / 0 / -	This study
Golden3b	-	ANSES	Malus domestica (Golden)	Leaf	2017	France	PACA	MN975288	MN975299	MN975326	A. arborescens SC	A. arborescens SC	√	0 / 0 / 0	This study
Golden3bisb	-	ANSES	Malus domestica (Golden)	Leaf	2017	France	PACA	MN975270	MN975298	-	A. alternata	-	-	0 / 0 / -	This study
Golden3bisc	-	ANSES	Malus domestica (Golden)	Leaf	2017	France	PACA	MN975269	MN975305	-	A. arborescens SC	-	-	0 / 0 / -	This study
Golden3c	-	ANSES	Malus domestica (Golden)	Leaf	2017	France	PACA	MN975269	MN975305	-	A. arborescens SC	-	-	0 / 0 / -	This study
Golden3d	-	ANSES	Malus domestica (Golden)	Leaf	2017	France	PACA	MN975269	MN975305	-	A. arborescens SC	-	-	0 / 0 / -	This study
Golden3f	-	ANSES	Malus domestica (Golden)	Leaf	2017	France	PACA	MN975270	MN975298	-	A. alternata	-	-	0 / 0 / -	This study
Goldrush1	-	ANSES	Malus domestica (Goldrush)	Leaf	2018	France	ARA	MN975297	MN975309	MN975332	A. alternata	A. alternata	-	0 / 0 / -	This study
Goldrush2	-	ANSES	Malus domestica (Goldrush)	Leaf	2018	France	ARA	MN975276	MN975298	MN975324	A. alternata	A. alternata	√	0 / 0 / 0	This study
Goldrush5	-	ANSES	Malus domestica (Goldrush)	Leaf	2018	France	ARA	MN975270	MN975298	-	A. alternata	-	-	0 / 0 / -	This study
Goldrush6	-	ANSES	Malus domestica (Goldrush)	Leaf	2018	France	ARA	MN975269	MN975306	MN975326	A. arborescens SC	A. arborescens SC	-	0 / 0 / -	This study
ICMP11682	-	ICMP	Malus domestica	Leaf	-	New Zealand	-	MN975269	MN975299	MN975326	A. arborescens SC	A. arborescens SC	-	0 / 0 / -	Toome-Heller et al. (2018)
ICMP22004	-	ICMP	Malus domestica (Envy)	Leaf	2016	New Zealand (Nelson)	-	MN975284	MN975305	MN975325	A. arborescens SC	A. arborescens SC	-	0 / 0 / 0	Toome-Heller et al. (2018)
ICMP22005	-	ICMP	Malus domestica (Envy)	Leaf	2016	New Zealand (Hawke's Bay)	-	MN975269	MN975305	-	A. arborescens SC	-	-	0 / 0 / 0	Toome-Heller et al. (2018)
LSVM 75	-	ANSES	Malus sp.	-	2001	United States	-	MN975270	MN975298	MN975332	A. alternata	A. alternata	-	1 / 1 / 1	This study
PL_BR_L	-	MR	Malus domestica (Pink Lady)	Leaf	2018	Israel (Galilee)	-	MN975285	MN975298	MN975324	A. alternata	A. alternata	-	0 / 0 / -	This study
PL_EZ_B	-	MR	Malus domestica (Pink Lady)	Fruit	2018	Israel (North Golan)	-	MN975270	MN975300	MN975324	A. alternata	A. alternata	-	0 / 0 / -	This study
PL_Nov_L1	-	MR	Malus domestica (Pink Lady)	Leaf	2017	Israel (South Golan)	-	MN975270	MN975298	-	A. alternata	-	√	0 / 0 / -	This study
PL_OR_C	-	MR	Malus domestica (Pink Lady)	Fruit	2016	Israel (North Golan)	-	MN975270	MN975298	-	A. alternata	-	-	0 / 0 / -	Gur et al. (2017)
PL_SH_B_3011	-	MR	Malus domestica (Pink Lady)	Fruit	2016	Israel (North Golan)	-	MN975270	MN975300	MN975333	A. alternata	A. alternata	-	0 / 0 / -	Gur et al. (2017)
PL_YN_FC1	-	MR	Malus domestica (Pink Lady)	Fruit	2017	Israel (Central Golan)	-	MN975275	MN975313	MN975324	A. alternata	A. alternata	-	0 / 0 / -	This study
Pomme Lxde_2	-	ANSES	Malus domestica (Galastar)	Fruit	2017	France	NA	MN975269	MN975305	-	A. arborescens SC	-	-	0 / 0 / -	This study
RA_AL_01_1	-	ANSES	Malus domestica (Gala)	Leaf	2018	France	ARA	MN975269	MN975299	-	A. arborescens SC	-	-	0 / 0 / -	This study
RA_AL_01_2	-	ANSES	Malus domestica (Gala)	Leaf	2018	France	ARA	MN975277	MN975299	-	A. arborescens SC	-	-	0 / 0 / -	This study
RA_AL_02_1	-	ANSES	Malus domestica (Canada)	Leaf	2018	France	ARA	MN975269	MN975305	-	A. arborescens SC	-	-	0 / 0 / -	This study
RA_AL_02_3	-	ANSES	Malus domestica (Canada)	Leaf	2018	France	ARA	MN975277	MN975305	-	A. arborescens SC	-	-	0 / 0 / -	This study
RA_AL_02_4	-	ANSES	Malus domestica (Canada)	Leaf	2018	France	ARA	MN975269	MN975305	-	A. arborescens SC	-	-	0 / 0 / -	This study
RA_AL_02_7	-	ANSES	Malus domestica (Canada)	Leaf	2018	France	ARA	MN975270	MN975314	-	A. alternata	-	-	0 / 0 / -	This study
RA_AL_03_1	-	ANSES	Malus domestica (Golden)	Leaf	2018	France	ARA	MN975269	MN975305	-	A. arborescens SC	-	-	0 / 0 / -	This study
RA_AL_04_1	-	ANSES	Malus domestica (Reinette du canada)	Leaf	2018	France	ARA	MN975291	MN975305	-	A. arborescens SC	-	-	0 / 0 / -	This study
RA_AL_07_3	-	ANSES	Malus domestica (Dalinette)	Leaf	2018	France	ARA	MN975270	MN975314	MN975333	A. alternata	A. alternata	-	0 / 0 / -	This study
RA_AL_07_4	-	ANSES	Malus domestica (Dalinette)	Leaf	2018	France	ARA	MN975290	MN975305	-	A. arborescens SC	-	-	0 / 0 / -	This study
RA_AL_08_2	-	ANSES	Malus domestica (Crimson Crisp)	Leaf	2018	France	ARA	MN975276	MN975306	-	A. arborescens SC	-	-	0 / 0 / -	This study
RA_AL_09_1	-	ANSES	Malus domestica (Reinette du canada)	Leaf	2018	France	ARA	MN975275	MN975314	-	A. alternata	-	-	0 / 0 / -	This study
RA_AL_09_5	-	ANSES	Malus domestica (Reinette du canada)	Leaf	2018	France	ARA	MN975270	MN975298	-	A. alternata	-	-	0 / 0 / -	This study
RA_AL_10_1	-	ANSES	Malus domestica (Golden)	Leaf	2018	France	ARA	MN975269	MN975299	MN975318	A. arborescens SC	A. arborescens SC	-	0 / 0 / -	This study
RA_AL_10_3	-	ANSES	Malus domestica (Golden)	Leaf	2018	France	ARA	MN975294	MN975299	MN975337	A. arborescens SC	A. arborescens SC	-	0 / 0 / -	This study
RA_AL_10_5	-	ANSES	Malus domestica (Golden)	Leaf	2018	France	ARA	MN975269	MN975305	-	A. arborescens SC	-	-	0 / 0 / -	This study
RA_AL_11_1	-	ANSES	Malus domestica (Royal Gala)	Leaf	2018	France	ARA	MN975271	MN975298	-	A. alternata	-	-	0 / 0 / -	This study
Reinette1	-	ANSES	Malus domestica (Reinette Grise)	Leaf	2018	France	ARA	MN975276	MN975298	MN975333	A. alternata	A. alternata	√	0 / 0 / 0	This study
Reinette10	-	ANSES	Malus domestica (Reinette Grise)	Leaf	2018	France	ARA	MN975289	MN975305	MN975339	A. arborescens SC	-	-	0 / 0 / -	This study
Reinette11	-	ANSES	Malus domestica (Reinette Grise)	Leaf	2018	France	ARA	MN975275	MN975298	-	A. alternata	-	-	0 / 0 / -	This study
Reinette12	-	ANSES	Malus domestica (Reinette Grise)	Leaf	2018	France	ARA	MN975270	MN975298	MN975338	A. alternata	A. alternata	√	0 / 0 / -	This study
Reinette13	-	ANSES	Malus domestica (Reinette Grise)	Leaf	2018	France	ARA	MN975288	MN975306	-	A. arborescens SC	-	√	0 / 0 / 0	This study
Reinette2	-	ANSES	Malus domestica (Reinette Grise)	Leaf	2018	France	ARA	MN975269	MN975305	-	A. arborescens SC	-	-	0 / 0 / -	This study
Reinette3	-	ANSES	Malus domestica (Reinette Grise)	Leaf	2018	France	ARA	MN975270	MN975298	-	A. alternata	-	-	0 / 0 / -	This study
Reinette4	-	ANSES	Malus domestica (Reinette Grise)	Leaf	2018	France	ARA	MN975270	MN975298	-	A. alternata	-	-	0 / 0 / -	This study
Reinette5	-	ANSES	Malus domestica (Reinette Grise)	Leaf	2018	France	ARA	MN975269	MN975305	-	A. arborescens SC	-	-	0 / 0 / -	This study
Reinette6	-	ANSES	Malus domestica (Reinette Grise)	Leaf	2018	France	ARA	MN975270	MN975298	-	A. alternata	-	-	0 / 0 / -	This study
Reinette7	-	ANSES	Malus domestica (Reinette Grise)	Leaf	2018	France	ARA	MN975270	MN975298	-	A. alternata	-	-	0 / 0 / -	This study
Reinette8	-	ANSES	Malus domestica (Reinette Grise)	Leaf	2018	France	ARA	MN975295	MN975305	MN975337	A. arborescens SC	A. arborescens SC	-	0 / 0 / -	This study
Reinette9	-	ANSES	Malus domestica (Reinette Grise)	Leaf	2018	France	ARA	MN975275	MN975298	-	A. alternata	-	-	0 / 0 / -	This study
RGR97.0013	-	AA	Malus domestica	-	-	New Zealand	-	MN975269	MN975299	MN975325	A. arborescens SC	A. arborescens SC	-	0 / 0 / -	Armitage et al. (2015)
RGR97.0016	-	AA	Malus domestica	-	-	New Zealand	-	MN975269	MN975305	MN975326	A. arborescens SC	A. arborescens SC	√	0 / 0 / 0	Armitage et al. (2015)
SD_BR_FB3	-	MR	Malus domestica (Sundowner)	Fruit	2017	Israel (Galilee)	-	MN975275	MN975313	-	A. alternata	-	-	0 / 0 / -	This study
SD_BR_FC1	-	MR	Malus domestica (Sundowner)	Fruit	2017	Israel (Galilee)	-	MN975270	MN975298	-	A. alternata	-	-	0 / 0 / -	This study
ANSES: French Agency for Food, Environmental and Occupational Health&Safety.
NCBI: National Center for Biotechnology Information
MC: Marina Collina
OA: Olufemi A. Akinsanmi
ICMP: International Collection of Microorganism from Plants
AA: Andrew D. Armitage
BP: Barry Prior
MR: Moshe Reuveni
TG: Thomas Guillemette
AP: Andrea Patriarca
WI: Westerdijk Institute
ARA: Auvergne-Rhône-Alpes
PACA: Provence Alpes-Côtes d'Azur
OCC: Occitanie
NA: Nouvelle Aquitaine
T: ex-type isolates
R: representative isolates
				252
				9
