# Supplementary material for: Identification and pathogenicity of Alternaria species associated with leaf blotch disease and premature defoliation in French apple orchards
Source: PeerJ. 2021 Dec 1;9:e12496. doi: 10.7717/peerj.12496 (PMC8643104; doi:10.7717/peerj.12496)
Supplement: Supplemental Information 4 — Data are presented by isolate, taxon, repetition and the apple cultivar (Gala or Golden Delicious) [file peerj-09-12496-s004.xlsx]

## Sheet: Feuil1
Isolate	Taxon	Repetition	Dpi	Apple_variety	Number_spots	Necrosed_surface
16_497bc	A_alternata	1	4	Gala	3	0.01
16_497bc	A_alternata	1	4	Gala	1	0.01
16_497bc	A_alternata	1	4	Gala	1	0.01
16_497bc	A_alternata	1	4	Gala	5	0.01
16_497bc	A_alternata	3	4	Gala	0	0
16_497bc	A_alternata	3	4	Gala	0	0
16_497bc	A_alternata	3	4	Gala	0	0
16_497bc	A_alternata	1	4	Golden	6	0.1
16_497bc	A_alternata	1	4	Golden	4	0.01
16_497bc	A_alternata	1	4	Golden	6	0.1
16_497bc	A_alternata	1	4	Golden	6	0.05
16_497bc	A_alternata	1	4	Golden	6	0.1
16_497bc	A_alternata	3	4	Golden	5	0.05
16_497bc	A_alternata	3	4	Golden	5	0.05
16_497bc	A_alternata	3	4	Golden	6	0.2
16_497bc	A_alternata	3	4	Golden	5	0.05
16_497bc	A_alternata	1	7	Gala	6	0.2
16_497bc	A_alternata	1	7	Gala	4	0.05
16_497bc	A_alternata	1	7	Gala	1	0.01
16_497bc	A_alternata	1	7	Gala	2	0.01
16_497bc	A_alternata	3	7	Gala	2	0.01
16_497bc	A_alternata	3	7	Gala	2	0.01
16_497bc	A_alternata	3	7	Gala	1	0.01
16_497bc	A_alternata	3	7	Gala	0	0
16_497bc	A_alternata	3	7	Gala	0	0
16_497bc	A_alternata	1	7	Golden	6	0.1
16_497bc	A_alternata	1	7	Golden	4	0.01
16_497bc	A_alternata	1	7	Golden	6	0.2
16_497bc	A_alternata	1	7	Golden	6	0.15
16_497bc	A_alternata	1	7	Golden	6	0.15
16_497bc	A_alternata	3	7	Golden	6	0.1
16_497bc	A_alternata	3	7	Golden	6	0.15
16_497bc	A_alternata	3	7	Golden	6	0.25
16_497bc	A_alternata	3	7	Golden	6	0.4
16_497bc	A_alternata	3	7	Golden	4	0.05
16_497bc	A_alternata	1	10	Gala	6	0.8
16_497bc	A_alternata	1	10	Gala	5	0.2
16_497bc	A_alternata	1	10	Gala	3	0.01
16_497bc	A_alternata	1	10	Gala	2	0.01
16_497bc	A_alternata	3	10	Gala	2	0.01
16_497bc	A_alternata	3	10	Gala	5	0.01
16_497bc	A_alternata	3	10	Gala	4	0.05
16_497bc	A_alternata	3	10	Gala	0	0
16_497bc	A_alternata	3	10	Gala	1	0.01
16_497bc	A_alternata	1	10	Golden	6	0.4
16_497bc	A_alternata	1	10	Golden	6	0.1
16_497bc	A_alternata	1	10	Golden	6	0.5
16_497bc	A_alternata	1	10	Golden	6	0.4
16_497bc	A_alternata	1	10	Golden	6	0.4
16_497bc	A_alternata	3	10	Golden	6	0.3
16_497bc	A_alternata	3	10	Golden	6	0.8
16_497bc	A_alternata	3	10	Golden	6	0.3
16_497bc	A_alternata	3	10	Golden	6	0.6
16_497bc	A_alternata	3	10	Golden	6	0.95
17_520	A_alternata	2	4	Gala	6	0.1
17_520	A_alternata	2	4	Gala	5	0.01
17_520	A_alternata	2	4	Gala	6	0.01
17_520	A_alternata	2	4	Gala	6	0.01
17_520	A_alternata	2	4	Gala	2	0.01
17_520	A_alternata	3	4	Gala	0	0
17_520	A_alternata	2	4	Golden	5	0.05
17_520	A_alternata	2	4	Golden	6	0.1
17_520	A_alternata	2	4	Golden	6	0.1
17_520	A_alternata	2	4	Golden	6	0.1
17_520	A_alternata	2	4	Golden	5	0.05
17_520	A_alternata	3	4	Golden	4	0.01
17_520	A_alternata	3	4	Golden	4	0.01
17_520	A_alternata	3	4	Golden	5	0.01
17_520	A_alternata	2	7	Gala	6	0.25
17_520	A_alternata	2	7	Gala	6	0.15
17_520	A_alternata	2	7	Gala	6	0.1
17_520	A_alternata	2	7	Gala	6	0.15
17_520	A_alternata	2	7	Gala	5	0.01
17_520	A_alternata	3	7	Gala	3	0.01
17_520	A_alternata	3	7	Gala	5	0.01
17_520	A_alternata	3	7	Gala	5	0.05
17_520	A_alternata	2	7	Golden	6	0.1
17_520	A_alternata	2	7	Golden	6	0.2
17_520	A_alternata	2	7	Golden	6	0.1
17_520	A_alternata	2	7	Golden	6	0.1
17_520	A_alternata	2	7	Golden	6	0.1
17_520	A_alternata	3	7	Golden	4	0.01
17_520	A_alternata	3	7	Golden	2	0.01
17_520	A_alternata	3	7	Golden	3	0.01
17_520	A_alternata	3	7	Golden	2	0.01
17_520	A_alternata	2	10	Gala	6	0.95
17_520	A_alternata	2	10	Gala	6	0.3
17_520	A_alternata	2	10	Gala	6	0.6
17_520	A_alternata	2	10	Gala	6	0.5
17_520	A_alternata	2	10	Gala	5	0.4
17_520	A_alternata	3	10	Gala	6	0.01
17_520	A_alternata	3	10	Gala	2	0.01
17_520	A_alternata	3	10	Gala	6	0.2
17_520	A_alternata	2	10	Golden	6	0.6
17_520	A_alternata	2	10	Golden	6	0.8
17_520	A_alternata	2	10	Golden	6	0.8
17_520	A_alternata	2	10	Golden	6	0.3
17_520	A_alternata	2	10	Golden	6	0.7
17_520	A_alternata	3	10	Golden	1	0.01
17_520	A_alternata	3	10	Golden	4	0.01
17_520	A_alternata	3	10	Golden	4	0.01
17_520	A_alternata	3	10	Golden	2	0.01
21_17_Pomme_4_2	A_alternata	2	4	Gala	1	0.01
21_17_Pomme_4_2	A_alternata	2	4	Gala	3	0.01
21_17_Pomme_4_2	A_alternata	2	4	Gala	6	0.01
21_17_Pomme_4_2	A_alternata	2	4	Gala	0	0.01
21_17_Pomme_4_2	A_alternata	2	4	Gala	5	0.01
21_17_Pomme_4_2	A_alternata	3	4	Gala	6	0.01
21_17_Pomme_4_2	A_alternata	2	4	Golden	3	0.01
21_17_Pomme_4_2	A_alternata	2	4	Golden	0	0
21_17_Pomme_4_2	A_alternata	2	4	Golden	0	0
21_17_Pomme_4_2	A_alternata	2	4	Golden	3	0.01
21_17_Pomme_4_2	A_alternata	2	4	Golden	2	0.01
21_17_Pomme_4_2	A_alternata	3	4	Golden	6	0.01
21_17_Pomme_4_2	A_alternata	3	4	Golden	6	0.01
21_17_Pomme_4_2	A_alternata	3	4	Golden	5	0.01
21_17_Pomme_4_2	A_alternata	2	7	Gala	4	0.01
21_17_Pomme_4_2	A_alternata	2	7	Gala	2	0.05
21_17_Pomme_4_2	A_alternata	2	7	Gala	6	0.1
21_17_Pomme_4_2	A_alternata	2	7	Gala	6	0.1
21_17_Pomme_4_2	A_alternata	2	7	Gala	6	0.1
21_17_Pomme_4_2	A_alternata	3	7	Gala	6	0.2
21_17_Pomme_4_2	A_alternata	3	7	Gala	6	0.05
21_17_Pomme_4_2	A_alternata	3	7	Gala	6	0.15
21_17_Pomme_4_2	A_alternata	2	7	Golden	6	0.2
21_17_Pomme_4_2	A_alternata	2	7	Golden	5	0.01
21_17_Pomme_4_2	A_alternata	2	7	Golden	6	0.05
21_17_Pomme_4_2	A_alternata	2	7	Golden	4	0.05
21_17_Pomme_4_2	A_alternata	2	7	Golden	6	0.01
21_17_Pomme_4_2	A_alternata	3	7	Golden	5	0.01
21_17_Pomme_4_2	A_alternata	3	7	Golden	2	0.01
21_17_Pomme_4_2	A_alternata	3	7	Golden	5	0.01
21_17_Pomme_4_2	A_alternata	3	7	Golden	2	0.01
21_17_Pomme_4_2	A_alternata	2	10	Gala	3	0.05
21_17_Pomme_4_2	A_alternata	2	10	Gala	1	0.05
21_17_Pomme_4_2	A_alternata	2	10	Gala	6	0.25
21_17_Pomme_4_2	A_alternata	2	10	Gala	6	0.6
21_17_Pomme_4_2	A_alternata	2	10	Gala	6	0.4
21_17_Pomme_4_2	A_alternata	3	10	Gala	6	0.3
21_17_Pomme_4_2	A_alternata	3	10	Gala	6	0.15
21_17_Pomme_4_2	A_alternata	3	10	Gala	6	0.4
21_17_Pomme_4_2	A_alternata	2	10	Golden	6	0.5
21_17_Pomme_4_2	A_alternata	2	10	Golden	6	0.25
21_17_Pomme_4_2	A_alternata	2	10	Golden	5	0.4
21_17_Pomme_4_2	A_alternata	2	10	Golden	5	0.3
21_17_Pomme_4_2	A_alternata	2	10	Golden	6	0.25
21_17_Pomme_4_2	A_alternata	3	10	Golden	6	0.01
21_17_Pomme_4_2	A_alternata	3	10	Golden	2	0.01
21_17_Pomme_4_2	A_alternata	3	10	Golden	6	0.05
21_17_Pomme_4_2	A_alternata	3	10	Golden	6	0.05
FERA648	A_alternata	2	4	Gala	0	0
FERA648	A_alternata	2	4	Gala	6	0.1
FERA648	A_alternata	2	4	Gala	6	0.01
FERA648	A_alternata	2	4	Gala	4	0.01
FERA648	A_alternata	2	4	Gala	6	0.01
FERA648	A_alternata	3	4	Gala	0	0
FERA648	A_alternata	2	4	Golden	5	0.01
FERA648	A_alternata	2	4	Golden	3	0.01
FERA648	A_alternata	2	4	Golden	5	0.1
FERA648	A_alternata	2	4	Golden	0	0
FERA648	A_alternata	2	4	Golden	1	0.01
FERA648	A_alternata	3	4	Golden	5	0.01
FERA648	A_alternata	3	4	Golden	6	0.05
FERA648	A_alternata	3	4	Golden	3	0.01
FERA648	A_alternata	2	7	Gala	5	0.01
FERA648	A_alternata	2	7	Gala	6	0.2
FERA648	A_alternata	2	7	Gala	6	0.1
FERA648	A_alternata	2	7	Gala	6	0.2
FERA648	A_alternata	2	7	Gala	6	0.1
FERA648	A_alternata	3	7	Gala	0	0
FERA648	A_alternata	3	7	Gala	4	0.01
FERA648	A_alternata	3	7	Gala	1	0.01
FERA648	A_alternata	2	7	Golden	5	0.05
FERA648	A_alternata	2	7	Golden	6	0.15
FERA648	A_alternata	2	7	Golden	6	0.2
FERA648	A_alternata	2	7	Golden	6	0.05
FERA648	A_alternata	2	7	Golden	6	0.15
FERA648	A_alternata	3	7	Golden	3	0.01
FERA648	A_alternata	3	7	Golden	3	0.01
FERA648	A_alternata	3	7	Golden	6	0.01
FERA648	A_alternata	3	7	Golden	5	0.05
FERA648	A_alternata	2	10	Gala	6	0.25
FERA648	A_alternata	2	10	Gala	6	0.6
FERA648	A_alternata	2	10	Gala	6	0.3
FERA648	A_alternata	2	10	Gala	6	0.8
FERA648	A_alternata	2	10	Gala	6	0.3
FERA648	A_alternata	3	10	Gala	5	0.01
FERA648	A_alternata	3	10	Gala	5	0.01
FERA648	A_alternata	3	10	Gala	6	0.05
FERA648	A_alternata	2	10	Golden	6	0.25
FERA648	A_alternata	2	10	Golden	6	0.7
FERA648	A_alternata	2	10	Golden	6	0.8
FERA648	A_alternata	2	10	Golden	6	0.2
FERA648	A_alternata	2	10	Golden	6	0.6
FERA648	A_alternata	3	10	Golden	1	0.01
FERA648	A_alternata	3	10	Golden	6	0.01
FERA648	A_alternata	3	10	Golden	2	0.01
FERA648	A_alternata	3	10	Golden	5	0.1
Goldrush_2	A_alternata	2	4	Gala	0	0
Goldrush_2	A_alternata	2	4	Gala	0	0
Goldrush_2	A_alternata	2	4	Gala	4	0.01
Goldrush_2	A_alternata	2	4	Gala	2	0.01
Goldrush_2	A_alternata	2	4	Gala	5	0.01
Goldrush_2	A_alternata	3	4	Gala	0	0
Goldrush_2	A_alternata	2	4	Golden	3	0.01
Goldrush_2	A_alternata	2	4	Golden	4	0.01
Goldrush_2	A_alternata	2	4	Golden	2	0.01
Goldrush_2	A_alternata	3	4	Golden	6	0.01
Goldrush_2	A_alternata	3	4	Golden	4	0.05
Goldrush_2	A_alternata	3	4	Golden	6	0.2
Goldrush_2	A_alternata	2	7	Gala	3	0.01
Goldrush_2	A_alternata	2	7	Gala	6	0.2
Goldrush_2	A_alternata	3	7	Gala	3	0.01
Goldrush_2	A_alternata	3	7	Gala	6	0.01
Goldrush_2	A_alternata	3	7	Gala	4	0.05
Goldrush_2	A_alternata	2	7	Golden	4	0.05
Goldrush_2	A_alternata	2	7	Golden	4	0.01
Goldrush_2	A_alternata	2	7	Golden	6	0.2
Goldrush_2	A_alternata	3	7	Golden	5	0.01
Goldrush_2	A_alternata	3	7	Golden	2	0.01
Goldrush_2	A_alternata	3	7	Golden	5	0.1
Goldrush_2	A_alternata	3	7	Golden	6	0.3
Goldrush_2	A_alternata	2	10	Gala	3	0.05
Goldrush_2	A_alternata	2	10	Gala	6	0.6
Goldrush_2	A_alternata	3	10	Gala	5	0.01
Goldrush_2	A_alternata	3	10	Gala	6	0.05
Goldrush_2	A_alternata	3	10	Gala	4	0.01
Goldrush_2	A_alternata	2	10	Golden	5	0.15
Goldrush_2	A_alternata	2	10	Golden	4	0.01
Goldrush_2	A_alternata	3	10	Golden	6	0.01
Goldrush_2	A_alternata	3	10	Golden	3	0.01
Goldrush_2	A_alternata	3	10	Golden	6	0.25
Goldrush_2	A_alternata	3	10	Golden	6	0.6
LSVM1448	A_alternata	2	4	Gala	2	0.01
LSVM1448	A_alternata	2	4	Gala	0	0
LSVM1448	A_alternata	2	4	Gala	3	0.01
LSVM1448	A_alternata	2	4	Gala	1	0.01
LSVM1448	A_alternata	2	4	Gala	4	0.05
LSVM1448	A_alternata	3	4	Gala	6	0.01
LSVM1448	A_alternata	3	4	Gala	6	0.01
LSVM1448	A_alternata	3	4	Gala	6	0.01
LSVM1448	A_alternata	3	4	Gala	6	0.05
LSVM1448	A_alternata	2	4	Golden	0	0
LSVM1448	A_alternata	2	4	Golden	0	0
LSVM1448	A_alternata	2	4	Golden	2	0.01
LSVM1448	A_alternata	3	4	Golden	6	0.01
LSVM1448	A_alternata	3	4	Golden	6	0.05
LSVM1448	A_alternata	3	4	Golden	6	0.05
LSVM1448	A_alternata	3	4	Golden	6	0.05
LSVM1448	A_alternata	2	7	Gala	3	0.1
LSVM1448	A_alternata	2	7	Gala	4	0.2
LSVM1448	A_alternata	3	7	Gala	6	0.01
LSVM1448	A_alternata	3	7	Gala	4	0.01
LSVM1448	A_alternata	3	7	Gala	5	0.05
LSVM1448	A_alternata	3	7	Gala	6	0.1
LSVM1448	A_alternata	3	7	Gala	6	0.05
LSVM1448	A_alternata	2	7	Golden	0	0
LSVM1448	A_alternata	2	7	Golden	0	0
LSVM1448	A_alternata	2	7	Golden	3	0.05
LSVM1448	A_alternata	3	7	Golden	6	0.05
LSVM1448	A_alternata	3	7	Golden	4	0.01
LSVM1448	A_alternata	3	7	Golden	6	0.05
LSVM1448	A_alternata	3	7	Golden	6	0.1
LSVM1448	A_alternata	3	7	Golden	6	0.05
LSVM1448	A_alternata	2	10	Gala	3	0.3
LSVM1448	A_alternata	2	10	Gala	4	0.9
LSVM1448	A_alternata	3	10	Gala	6	0.05
LSVM1448	A_alternata	2	10	Golden	0	0
LSVM1448	A_alternata	2	10	Golden	0	0
LSVM1448	A_alternata	3	10	Golden	6	0.15
LSVM1448	A_alternata	3	10	Golden	4	0.05
LSVM1448	A_alternata	3	10	Golden	6	0.05
LSVM1448	A_alternata	3	10	Golden	6	0.3
LSVM1448	A_alternata	3	10	Golden	6	0.15
PL_Nov_Li	A_alternata	2	4	Gala	6	0.01
PL_Nov_Li	A_alternata	2	4	Gala	3	0.01
PL_Nov_Li	A_alternata	2	4	Gala	3	0.01
PL_Nov_Li	A_alternata	2	4	Gala	2	0.01
PL_Nov_Li	A_alternata	2	4	Gala	6	0.05
PL_Nov_Li	A_alternata	3	4	Gala	0	0
PL_Nov_Li	A_alternata	2	4	Golden	0	0
PL_Nov_Li	A_alternata	2	4	Golden	3	0.01
PL_Nov_Li	A_alternata	2	4	Golden	6	0.1
PL_Nov_Li	A_alternata	2	4	Golden	0	0
PL_Nov_Li	A_alternata	2	4	Golden	0	0
PL_Nov_Li	A_alternata	3	4	Golden	6	0.01
PL_Nov_Li	A_alternata	3	4	Golden	4	0.01
PL_Nov_Li	A_alternata	3	4	Golden	6	0.01
PL_Nov_Li	A_alternata	2	7	Gala	6	0.15
PL_Nov_Li	A_alternata	2	7	Gala	6	0.05
PL_Nov_Li	A_alternata	2	7	Gala	5	0.05
PL_Nov_Li	A_alternata	2	7	Gala	6	0.25
PL_Nov_Li	A_alternata	2	7	Gala	6	0.15
PL_Nov_Li	A_alternata	3	7	Gala	0	0
PL_Nov_Li	A_alternata	3	7	Gala	0	0
PL_Nov_Li	A_alternata	3	7	Gala	0	0
PL_Nov_Li	A_alternata	2	7	Golden	2	0.01
PL_Nov_Li	A_alternata	2	7	Golden	6	0.1
PL_Nov_Li	A_alternata	2	7	Golden	6	0.4
PL_Nov_Li	A_alternata	2	7	Golden	6	0.15
PL_Nov_Li	A_alternata	2	7	Golden	0	0
PL_Nov_Li	A_alternata	3	7	Golden	6	0.05
PL_Nov_Li	A_alternata	3	7	Golden	6	0.01
PL_Nov_Li	A_alternata	3	7	Golden	5	0.01
PL_Nov_Li	A_alternata	3	7	Golden	6	0.05
PL_Nov_Li	A_alternata	2	10	Gala	6	0.6
PL_Nov_Li	A_alternata	2	10	Gala	6	0.3
PL_Nov_Li	A_alternata	2	10	Gala	6	0.15
PL_Nov_Li	A_alternata	2	10	Gala	6	0.7
PL_Nov_Li	A_alternata	2	10	Gala	6	0.25
PL_Nov_Li	A_alternata	3	10	Gala	6	0.01
PL_Nov_Li	A_alternata	3	10	Gala	5	0
PL_Nov_Li	A_alternata	3	10	Gala	6	0.01
PL_Nov_Li	A_alternata	2	10	Golden	6	0.2
PL_Nov_Li	A_alternata	2	10	Golden	6	0.25
PL_Nov_Li	A_alternata	2	10	Golden	6	0.9
PL_Nov_Li	A_alternata	2	10	Golden	6	0.4
PL_Nov_Li	A_alternata	2	10	Golden	2	0.01
PL_Nov_Li	A_alternata	3	10	Golden	6	0.05
PL_Nov_Li	A_alternata	3	10	Golden	6	0.15
PL_Nov_Li	A_alternata	3	10	Golden	5	0.01
PL_Nov_Li	A_alternata	3	10	Golden	6	0.7
Reinette_1	A_alternata	2	4	Gala	5	0.01
Reinette_1	A_alternata	2	4	Gala	5	0.05
Reinette_1	A_alternata	2	4	Gala	1	0.01
Reinette_1	A_alternata	2	4	Gala	3	0.01
Reinette_1	A_alternata	3	4	Gala	6	0.05
Reinette_1	A_alternata	2	4	Golden	3	0.01
Reinette_1	A_alternata	2	4	Golden	5	0.01
Reinette_1	A_alternata	2	4	Golden	5	0.01
Reinette_1	A_alternata	2	4	Golden	1	0.01
Reinette_1	A_alternata	2	4	Golden	0	0
Reinette_1	A_alternata	3	4	Golden	6	0.05
Reinette_1	A_alternata	3	4	Golden	6	0.05
Reinette_1	A_alternata	3	4	Golden	6	0.15
Reinette_1	A_alternata	2	7	Gala	6	0.1
Reinette_1	A_alternata	2	7	Gala	5	0.15
Reinette_1	A_alternata	2	7	Gala	2	0.01
Reinette_1	A_alternata	2	7	Gala	6	0.1
Reinette_1	A_alternata	3	7	Gala	6	0.01
Reinette_1	A_alternata	3	7	Gala	5	0.01
Reinette_1	A_alternata	3	7	Gala	6	0.05
Reinette_1	A_alternata	2	7	Golden	6	0.2
Reinette_1	A_alternata	2	7	Golden	6	0.2
Reinette_1	A_alternata	2	7	Golden	6	0.2
Reinette_1	A_alternata	3	7	Golden	6	0.05
Reinette_1	A_alternata	3	7	Golden	6	0.01
Reinette_1	A_alternata	3	7	Golden	6	0.25
Reinette_1	A_alternata	3	7	Golden	6	0.2
Reinette_1	A_alternata	2	10	Gala	6	0.2
Reinette_1	A_alternata	2	10	Gala	5	0.5
Reinette_1	A_alternata	2	10	Gala	5	0.1
Reinette_1	A_alternata	2	10	Gala	6	0.5
Reinette_1	A_alternata	3	10	Gala	6	0.01
Reinette_1	A_alternata	3	10	Gala	3	0.01
Reinette_1	A_alternata	3	10	Gala	6	0.05
Reinette_1	A_alternata	2	10	Golden	6	0.5
Reinette_1	A_alternata	2	10	Golden	6	0.6
Reinette_1	A_alternata	2	10	Golden	6	0.7
Reinette_1	A_alternata	3	10	Golden	6	0.2
Reinette_1	A_alternata	3	10	Golden	5	0.01
Reinette_1	A_alternata	3	10	Golden	6	0.6
Reinette_1	A_alternata	3	10	Golden	6	0.8
Reinette_12	A_alternata	2	4	Gala	0	0
Reinette_12	A_alternata	2	4	Gala	0	0
Reinette_12	A_alternata	2	4	Gala	4	0.01
Reinette_12	A_alternata	2	4	Gala	0	0
Reinette_12	A_alternata	2	4	Gala	1	0.01
Reinette_12	A_alternata	3	4	Gala	0	0
Reinette_12	A_alternata	3	4	Gala	4	0.05
Reinette_12	A_alternata	3	4	Gala	0	0
Reinette_12	A_alternata	3	4	Gala	5	0.05
Reinette_12	A_alternata	2	4	Golden	0	0
Reinette_12	A_alternata	2	4	Golden	6	0.01
Reinette_12	A_alternata	2	4	Golden	0	0
Reinette_12	A_alternata	3	4	Golden	1	0.01
Reinette_12	A_alternata	3	4	Golden	3	0.01
Reinette_12	A_alternata	3	4	Golden	4	0.05
Reinette_12	A_alternata	3	4	Golden	4	0.01
Reinette_12	A_alternata	2	7	Gala	2	0.01
Reinette_12	A_alternata	2	7	Gala	6	0.1
Reinette_12	A_alternata	3	7	Gala	5	0.05
Reinette_12	A_alternata	3	7	Gala	6	0.05
Reinette_12	A_alternata	3	7	Gala	4	0.01
Reinette_12	A_alternata	3	7	Gala	5	0.05
Reinette_12	A_alternata	3	7	Gala	1	0.01
Reinette_12	A_alternata	2	7	Golden	0	0
Reinette_12	A_alternata	2	7	Golden	1	0.01
Reinette_12	A_alternata	2	7	Golden	0	0
Reinette_12	A_alternata	3	7	Golden	1	0.01
Reinette_12	A_alternata	3	7	Golden	1	0.01
Reinette_12	A_alternata	3	7	Golden	1	0.01
Reinette_12	A_alternata	3	7	Golden	4	0.05
Reinette_12	A_alternata	3	7	Golden	4	0.05
Reinette_12	A_alternata	2	10	Gala	2	0.01
Reinette_12	A_alternata	2	10	Gala	6	0.3
Reinette_12	A_alternata	3	10	Gala	6	0.1
Reinette_12	A_alternata	3	10	Gala	6	0.15
Reinette_12	A_alternata	3	10	Gala	2	0.01
Reinette_12	A_alternata	3	10	Gala	5	0.05
Reinette_12	A_alternata	3	10	Gala	1	0.01
Reinette_12	A_alternata	2	10	Golden	2	0
Reinette_12	A_alternata	2	10	Golden	1	0.01
Reinette_12	A_alternata	2	10	Golden	1	0
Reinette_12	A_alternata	3	10	Golden	1	0.01
Reinette_12	A_alternata	3	10	Golden	1	0.01
Reinette_12	A_alternata	3	10	Golden	5	0.01
Reinette_12	A_alternata	3	10	Golden	6	0.2
Reinette_12	A_alternata	3	10	Golden	6	0.1
16_17Pomme2	A_arborescens	2	4	Gala	0	0
16_17Pomme2	A_arborescens	2	4	Gala	4	0.01
16_17Pomme2	A_arborescens	2	4	Gala	6	0.05
16_17Pomme2	A_arborescens	2	4	Gala	6	0.01
16_17Pomme2	A_arborescens	2	4	Gala	6	0.1
16_17Pomme2	A_arborescens	3	4	Gala	5	0.01
16_17Pomme2	A_arborescens	3	4	Gala	6	0.1
16_17Pomme2	A_arborescens	2	4	Golden	3	0.01
16_17Pomme2	A_arborescens	2	4	Golden	6	0.05
16_17Pomme2	A_arborescens	2	4	Golden	4	0.01
16_17Pomme2	A_arborescens	2	4	Golden	6	0.01
16_17Pomme2	A_arborescens	2	4	Golden	3	0.01
16_17Pomme2	A_arborescens	3	4	Golden	6	0.01
16_17Pomme2	A_arborescens	3	4	Golden	6	0.01
16_17Pomme2	A_arborescens	3	4	Golden	6	0.01
16_17Pomme2	A_arborescens	2	7	Gala	6	0.1
16_17Pomme2	A_arborescens	2	7	Gala	5	0.05
16_17Pomme2	A_arborescens	2	7	Gala	6	0.1
16_17Pomme2	A_arborescens	2	7	Gala	5	0.05
16_17Pomme2	A_arborescens	2	7	Gala	6	0.2
16_17Pomme2	A_arborescens	3	7	Gala	6	0.05
16_17Pomme2	A_arborescens	3	7	Gala	5	0.1
16_17Pomme2	A_arborescens	3	7	Gala	6	0.1
16_17Pomme2	A_arborescens	3	7	Gala	5	0.05
16_17Pomme2	A_arborescens	3	7	Gala	6	0.15
16_17Pomme2	A_arborescens	2	7	Golden	6	0.15
16_17Pomme2	A_arborescens	2	7	Golden	6	0.15
16_17Pomme2	A_arborescens	2	7	Golden	6	0.1
16_17Pomme2	A_arborescens	2	7	Golden	6	0.1
16_17Pomme2	A_arborescens	2	7	Golden	6	0.15
16_17Pomme2	A_arborescens	3	7	Golden	6	0.01
16_17Pomme2	A_arborescens	3	7	Golden	5	0.01
16_17Pomme2	A_arborescens	3	7	Golden	6	0.1
16_17Pomme2	A_arborescens	3	7	Golden	5	0.01
16_17Pomme2	A_arborescens	3	7	Golden	6	0.01
16_17Pomme2	A_arborescens	2	10	Gala	6	0.7
16_17Pomme2	A_arborescens	2	10	Gala	6	0.1
16_17Pomme2	A_arborescens	2	10	Gala	6	0.5
16_17Pomme2	A_arborescens	2	10	Gala	6	0.1
16_17Pomme2	A_arborescens	2	10	Gala	6	0.8
16_17Pomme2	A_arborescens	3	10	Gala	6	0.3
16_17Pomme2	A_arborescens	3	10	Gala	6	0.3
16_17Pomme2	A_arborescens	3	10	Gala	6	0.1
16_17Pomme2	A_arborescens	3	10	Gala	6	0.35
16_17Pomme2	A_arborescens	3	10	Gala	6	0.25
16_17Pomme2	A_arborescens	2	10	Golden	6	0.6
16_17Pomme2	A_arborescens	2	10	Golden	6	0.6
16_17Pomme2	A_arborescens	2	10	Golden	6	0.3
16_17Pomme2	A_arborescens	2	10	Golden	6	0.3
16_17Pomme2	A_arborescens	2	10	Golden	6	0.5
16_17Pomme2	A_arborescens	3	10	Golden	6	0.2
16_17Pomme2	A_arborescens	3	10	Golden	6	0.35
16_17Pomme2	A_arborescens	3	10	Golden	6	0.4
16_17Pomme2	A_arborescens	3	10	Golden	6	0.01
16_17Pomme2	A_arborescens	3	10	Golden	5	0.2
16_489a3b	A_arborescens	1	4	Gala	1	0.01
16_489a3b	A_arborescens	1	4	Gala	3	0.01
16_489a3b	A_arborescens	1	4	Gala	6	0.01
16_489a3b	A_arborescens	1	4	Gala	6	0.1
16_489a3b	A_arborescens	1	4	Gala	5	0.01
16_489a3b	A_arborescens	1	4	Golden	5	0.05
16_489a3b	A_arborescens	1	4	Golden	6	0.1
16_489a3b	A_arborescens	1	4	Golden	6	0.1
16_489a3b	A_arborescens	1	4	Golden	6	0.1
16_489a3b	A_arborescens	1	7	Gala	3	0.01
16_489a3b	A_arborescens	1	7	Gala	2	0.01
16_489a3b	A_arborescens	1	7	Gala	2	0.01
16_489a3b	A_arborescens	1	7	Gala	6	0.1
16_489a3b	A_arborescens	1	7	Gala	5	0.05
16_489a3b	A_arborescens	3	7	Gala	5	0.01
16_489a3b	A_arborescens	3	7	Gala	4	0.01
16_489a3b	A_arborescens	1	7	Golden	6	0.2
16_489a3b	A_arborescens	1	7	Golden	6	0.1
16_489a3b	A_arborescens	1	7	Golden	6	0.1
16_489a3b	A_arborescens	1	7	Golden	6	0.15
16_489a3b	A_arborescens	1	7	Golden	6	0.2
16_489a3b	A_arborescens	3	7	Golden	6	0.1
16_489a3b	A_arborescens	3	7	Golden	5	0.05
16_489a3b	A_arborescens	3	7	Golden	0	0
16_489a3b	A_arborescens	1	10	Gala	4	0.01
16_489a3b	A_arborescens	1	10	Gala	4	0.01
16_489a3b	A_arborescens	1	10	Gala	6	0.01
16_489a3b	A_arborescens	1	10	Gala	6	0.15
16_489a3b	A_arborescens	1	10	Gala	6	0.1
16_489a3b	A_arborescens	3	10	Gala	6	0.01
16_489a3b	A_arborescens	3	10	Gala	3	0.05
16_489a3b	A_arborescens	3	10	Gala	0	0
16_489a3b	A_arborescens	3	10	Gala	6	0.05
16_489a3b	A_arborescens	1	10	Golden	6	0.15
16_489a3b	A_arborescens	1	10	Golden	6	0.15
16_489a3b	A_arborescens	1	10	Golden	6	0.15
16_489a3b	A_arborescens	1	10	Golden	6	0.95
16_489a3b	A_arborescens	1	10	Golden	6	0.3
16_489a3b	A_arborescens	3	10	Golden	6	0.3
16_489a3b	A_arborescens	3	10	Golden	6	0.25
16_489a3b	A_arborescens	3	10	Golden	0	0
16_489a3b	A_arborescens	3	10	Golden	6	0.15
16_489a3b	A_arborescens	3	10	Golden	3	0.01
16_489b1a	A_arborescens	1	4	Gala	6	0.01
16_489b1a	A_arborescens	1	4	Gala	6	0.05
16_489b1a	A_arborescens	1	4	Gala	6	0.1
16_489b1a	A_arborescens	1	4	Gala	3	0.01
16_489b1a	A_arborescens	3	4	Gala	0	0
16_489b1a	A_arborescens	3	4	Gala	0	0
16_489b1a	A_arborescens	3	4	Gala	0	0
16_489b1a	A_arborescens	1	4	Golden	5	0.1
16_489b1a	A_arborescens	1	4	Golden	6	0.1
16_489b1a	A_arborescens	1	4	Golden	6	0.05
16_489b1a	A_arborescens	1	4	Golden	5	0.05
16_489b1a	A_arborescens	1	4	Golden	4	0.01
16_489b1a	A_arborescens	3	4	Golden	2	0.01
16_489b1a	A_arborescens	3	4	Golden	6	0.01
16_489b1a	A_arborescens	3	4	Golden	3	0.01
16_489b1a	A_arborescens	3	4	Golden	6	0.05
16_489b1a	A_arborescens	1	7	Gala	3	0.01
16_489b1a	A_arborescens	1	7	Gala	4	0.05
16_489b1a	A_arborescens	1	7	Gala	6	0.1
16_489b1a	A_arborescens	1	7	Gala	4	0.01
16_489b1a	A_arborescens	3	7	Gala	0	0
16_489b1a	A_arborescens	3	7	Gala	0	0
16_489b1a	A_arborescens	3	7	Gala	0	0
16_489b1a	A_arborescens	3	7	Gala	3	0.01
16_489b1a	A_arborescens	3	7	Gala	1	0.01
16_489b1a	A_arborescens	1	7	Golden	6	0.1
16_489b1a	A_arborescens	1	7	Golden	6	0.3
16_489b1a	A_arborescens	1	7	Golden	6	0.1
16_489b1a	A_arborescens	1	7	Golden	6	0.1
16_489b1a	A_arborescens	1	7	Golden	6	0.1
16_489b1a	A_arborescens	3	7	Golden	4	0.05
16_489b1a	A_arborescens	3	7	Golden	6	0.2
16_489b1a	A_arborescens	3	7	Golden	6	0.15
16_489b1a	A_arborescens	3	7	Golden	4	0.01
16_489b1a	A_arborescens	3	7	Golden	6	0.2
16_489b1a	A_arborescens	1	10	Gala	6	0.01
16_489b1a	A_arborescens	1	10	Gala	4	0.01
16_489b1a	A_arborescens	1	10	Gala	6	0.15
16_489b1a	A_arborescens	1	10	Gala	5	0.05
16_489b1a	A_arborescens	3	10	Gala	1	0.01
16_489b1a	A_arborescens	3	10	Gala	0	0
16_489b1a	A_arborescens	3	10	Gala	4	0.01
16_489b1a	A_arborescens	3	10	Gala	0	0
16_489b1a	A_arborescens	3	10	Gala	4	0.01
16_489b1a	A_arborescens	1	10	Golden	6	0.9
16_489b1a	A_arborescens	1	10	Golden	6	0.4
16_489b1a	A_arborescens	1	10	Golden	6	0.1
16_489b1a	A_arborescens	1	10	Golden	6	0.2
16_489b1a	A_arborescens	1	10	Golden	6	0.15
16_489b1a	A_arborescens	3	10	Golden	6	0.4
16_489b1a	A_arborescens	3	10	Golden	6	0.7
16_489b1a	A_arborescens	3	10	Golden	6	0.55
16_489b1a	A_arborescens	3	10	Golden	6	0.25
16_489b1a	A_arborescens	3	10	Golden	6	0.6
16_489b3a	A_arborescens	1	4	Gala	0	0
16_489b3a	A_arborescens	1	4	Gala	0	0
16_489b3a	A_arborescens	1	4	Gala	0	0
16_489b3a	A_arborescens	1	4	Gala	0	0
16_489b3a	A_arborescens	3	4	Gala	0	0
16_489b3a	A_arborescens	3	4	Gala	0	0
16_489b3a	A_arborescens	3	4	Gala	0	0
16_489b3a	A_arborescens	1	4	Golden	6	0.05
16_489b3a	A_arborescens	1	4	Golden	4	0.05
16_489b3a	A_arborescens	1	4	Golden	5	0.05
16_489b3a	A_arborescens	1	4	Golden	5	0.01
16_489b3a	A_arborescens	3	4	Golden	3	0.01
16_489b3a	A_arborescens	3	4	Golden	3	0.01
16_489b3a	A_arborescens	3	4	Golden	1	0.01
16_489b3a	A_arborescens	3	4	Golden	2	0.01
16_489b3a	A_arborescens	1	7	Gala	0	0
16_489b3a	A_arborescens	1	7	Gala	0	0
16_489b3a	A_arborescens	1	7	Gala	0	0
16_489b3a	A_arborescens	1	7	Gala	0	0
16_489b3a	A_arborescens	3	7	Gala	3	0.01
16_489b3a	A_arborescens	3	7	Gala	5	0.01
16_489b3a	A_arborescens	3	7	Gala	0	0
16_489b3a	A_arborescens	3	7	Gala	0	0
16_489b3a	A_arborescens	3	7	Gala	4	0.01
16_489b3a	A_arborescens	1	7	Golden	6	0.1
16_489b3a	A_arborescens	1	7	Golden	6	0.1
16_489b3a	A_arborescens	1	7	Golden	6	0.01
16_489b3a	A_arborescens	1	7	Golden	6	0.1
16_489b3a	A_arborescens	3	7	Golden	1	0.01
16_489b3a	A_arborescens	3	7	Golden	2	0.01
16_489b3a	A_arborescens	3	7	Golden	4	0.01
16_489b3a	A_arborescens	3	7	Golden	4	0.01
16_489b3a	A_arborescens	3	7	Golden	2	0.01
16_489b3a	A_arborescens	1	10	Gala	0	0
16_489b3a	A_arborescens	1	10	Gala	1	0
16_489b3a	A_arborescens	1	10	Gala	0	0
16_489b3a	A_arborescens	1	10	Gala	0	0
16_489b3a	A_arborescens	3	10	Gala	3	0.01
16_489b3a	A_arborescens	3	10	Gala	5	0.1
16_489b3a	A_arborescens	3	10	Gala	4	0.05
16_489b3a	A_arborescens	3	10	Gala	1	0.01
16_489b3a	A_arborescens	3	10	Gala	2	0.05
16_489b3a	A_arborescens	1	10	Golden	6	0.25
16_489b3a	A_arborescens	1	10	Golden	5	0.1
16_489b3a	A_arborescens	1	10	Golden	6	0.4
16_489b3a	A_arborescens	1	10	Golden	6	0.1
16_489b3a	A_arborescens	1	10	Golden	6	0.15
16_489b3a	A_arborescens	3	10	Golden	6	0.01
16_489b3a	A_arborescens	3	10	Golden	4	0.01
16_489b3a	A_arborescens	3	10	Golden	6	0.2
16_489b3a	A_arborescens	3	10	Golden	5	0.01
16_489b3a	A_arborescens	3	10	Golden	5	0.01
16_490b4a	A_arborescens	1	4	Gala	2	0.01
16_490b4a	A_arborescens	1	4	Gala	4	0.01
16_490b4a	A_arborescens	1	4	Gala	0	0
16_490b4a	A_arborescens	1	4	Gala	0	0
16_490b4a	A_arborescens	3	4	Gala	3	0.01
16_490b4a	A_arborescens	3	4	Gala	5	0.05
16_490b4a	A_arborescens	3	4	Gala	3	0.01
16_490b4a	A_arborescens	1	4	Golden	6	0.1
16_490b4a	A_arborescens	1	4	Golden	6	0.05
16_490b4a	A_arborescens	1	4	Golden	5	0.05
16_490b4a	A_arborescens	1	4	Golden	6	0.05
16_490b4a	A_arborescens	1	4	Golden	6	0.05
16_490b4a	A_arborescens	3	4	Golden	0	0
16_490b4a	A_arborescens	3	4	Golden	1	0.01
16_490b4a	A_arborescens	3	4	Golden	1	0.01
16_490b4a	A_arborescens	3	4	Golden	2	0.01
16_490b4a	A_arborescens	1	7	Gala	3	0.01
16_490b4a	A_arborescens	1	7	Gala	5	0.01
16_490b4a	A_arborescens	1	7	Gala	0	0
16_490b4a	A_arborescens	1	7	Gala	0	0
16_490b4a	A_arborescens	3	7	Gala	5	0.05
16_490b4a	A_arborescens	3	7	Gala	6	0.2
16_490b4a	A_arborescens	3	7	Gala	3	0.01
16_490b4a	A_arborescens	3	7	Gala	1	0.01
16_490b4a	A_arborescens	3	7	Gala	6	0.05
16_490b4a	A_arborescens	1	7	Golden	6	0.2
16_490b4a	A_arborescens	1	7	Golden	6	0.15
16_490b4a	A_arborescens	1	7	Golden	6	0.1
16_490b4a	A_arborescens	1	7	Golden	6	0.2
16_490b4a	A_arborescens	1	7	Golden	6	0.15
16_490b4a	A_arborescens	3	7	Golden	0	0
16_490b4a	A_arborescens	3	7	Golden	1	0.01
16_490b4a	A_arborescens	3	7	Golden	1	0.01
16_490b4a	A_arborescens	3	7	Golden	0	0
16_490b4a	A_arborescens	3	7	Golden	1	0.01
16_490b4a	A_arborescens	1	10	Gala	6	0.01
16_490b4a	A_arborescens	1	10	Gala	6	0.01
16_490b4a	A_arborescens	1	10	Gala	0	0
16_490b4a	A_arborescens	1	10	Gala	0	0
16_490b4a	A_arborescens	3	10	Gala	5	0.2
16_490b4a	A_arborescens	3	10	Gala	6	0.2
16_490b4a	A_arborescens	3	10	Gala	6	0.6
16_490b4a	A_arborescens	3	10	Gala	6	0.25
16_490b4a	A_arborescens	3	10	Gala	2	0.01
16_490b4a	A_arborescens	1	10	Golden	6	0.75
16_490b4a	A_arborescens	1	10	Golden	6	0.4
16_490b4a	A_arborescens	1	10	Golden	6	0.3
16_490b4a	A_arborescens	1	10	Golden	6	0.4
16_490b4a	A_arborescens	1	10	Golden	6	0.3
16_490b4a	A_arborescens	3	10	Golden	0	0
16_490b4a	A_arborescens	3	10	Golden	5	0.01
16_490b4a	A_arborescens	3	10	Golden	2	0.01
16_490b4a	A_arborescens	3	10	Golden	1	0.01
16_490b4a	A_arborescens	3	10	Golden	5	0.01
16_491a3a	A_arborescens	2	4	Gala	6	0.1
16_491a3a	A_arborescens	2	4	Gala	3	0.01
16_491a3a	A_arborescens	2	4	Gala	0	0
16_491a3a	A_arborescens	2	4	Gala	0	0
16_491a3a	A_arborescens	2	4	Gala	5	0.01
16_491a3a	A_arborescens	2	4	Golden	1	0.01
16_491a3a	A_arborescens	2	4	Golden	6	0.1
16_491a3a	A_arborescens	2	4	Golden	4	0.01
16_491a3a	A_arborescens	2	4	Golden	6	0.05
16_491a3a	A_arborescens	2	4	Golden	3	0.01
16_491a3a	A_arborescens	2	7	Gala	6	0.2
16_491a3a	A_arborescens	2	7	Gala	6	0.1
16_491a3a	A_arborescens	2	7	Gala	6	0.15
16_491a3a	A_arborescens	2	7	Gala	1	0.01
16_491a3a	A_arborescens	2	7	Gala	0	0
16_491a3a	A_arborescens	3	7	Gala	6	0.2
16_491a3a	A_arborescens	3	7	Gala	6	0.2
16_491a3a	A_arborescens	2	7	Golden	6	0.1
16_491a3a	A_arborescens	2	7	Golden	6	0.2
16_491a3a	A_arborescens	2	7	Golden	6	0.2
16_491a3a	A_arborescens	2	7	Golden	6	0.3
16_491a3a	A_arborescens	2	7	Golden	6	0.2
16_491a3a	A_arborescens	3	7	Golden	3	0.01
16_491a3a	A_arborescens	3	7	Golden	4	0.01
16_491a3a	A_arborescens	3	7	Golden	2	0.01
16_491a3a	A_arborescens	2	10	Gala	6	0.7
16_491a3a	A_arborescens	2	10	Gala	6	0.5
16_491a3a	A_arborescens	2	10	Gala	6	0.6
16_491a3a	A_arborescens	2	10	Gala	2	0.01
16_491a3a	A_arborescens	2	10	Gala	4	0.01
16_491a3a	A_arborescens	3	10	Gala	6	0.55
16_491a3a	A_arborescens	3	10	Gala	6	0.5
16_491a3a	A_arborescens	3	10	Gala	3	0.01
16_491a3a	A_arborescens	3	10	Gala	6	0.05
16_491a3a	A_arborescens	2	10	Golden	6	0.3
16_491a3a	A_arborescens	2	10	Golden	6	0.9
16_491a3a	A_arborescens	2	10	Golden	6	0.8
16_491a3a	A_arborescens	2	10	Golden	6	0.8
16_491a3a	A_arborescens	2	10	Golden	6	0.7
16_491a3a	A_arborescens	3	10	Golden	4	0.01
16_491a3a	A_arborescens	3	10	Golden	2	0.01
16_491a3a	A_arborescens	3	10	Golden	2	0.01
16_491a3a	A_arborescens	3	10	Golden	4	0.01
16_491a3a	A_arborescens	3	10	Golden	1	0.01
16_497b2c	A_arborescens	2	4	Gala	2	0.01
16_497b2c	A_arborescens	2	4	Gala	3	0.01
16_497b2c	A_arborescens	2	4	Gala	0	0
16_497b2c	A_arborescens	2	4	Gala	3	0.01
16_497b2c	A_arborescens	2	4	Gala	0	0
16_497b2c	A_arborescens	3	4	Gala	0	0
16_497b2c	A_arborescens	3	4	Gala	0	0
16_497b2c	A_arborescens	2	4	Golden	3	0.01
16_497b2c	A_arborescens	2	4	Golden	1	0.01
16_497b2c	A_arborescens	2	4	Golden	1	0.01
16_497b2c	A_arborescens	2	4	Golden	6	0.1
16_497b2c	A_arborescens	2	4	Golden	1	0.01
16_497b2c	A_arborescens	3	4	Golden	5	0.01
16_497b2c	A_arborescens	3	4	Golden	6	0.01
16_497b2c	A_arborescens	3	4	Golden	4	0.01
16_497b2c	A_arborescens	2	7	Gala	6	0.1
16_497b2c	A_arborescens	2	7	Gala	5	0.01
16_497b2c	A_arborescens	2	7	Gala	5	0.05
16_497b2c	A_arborescens	2	7	Gala	6	0.1
16_497b2c	A_arborescens	2	7	Gala	6	0.1
16_497b2c	A_arborescens	3	7	Gala	5	0.05
16_497b2c	A_arborescens	3	7	Gala	5	0.1
16_497b2c	A_arborescens	3	7	Gala	4	0.1
16_497b2c	A_arborescens	3	7	Gala	2	0.01
16_497b2c	A_arborescens	3	7	Gala	0	0
16_497b2c	A_arborescens	2	7	Golden	6	0.25
16_497b2c	A_arborescens	2	7	Golden	6	0.1
16_497b2c	A_arborescens	2	7	Golden	5	0.05
16_497b2c	A_arborescens	2	7	Golden	6	0.5
16_497b2c	A_arborescens	2	7	Golden	6	0.05
16_497b2c	A_arborescens	3	7	Golden	2	0.01
16_497b2c	A_arborescens	3	7	Golden	6	0.01
16_497b2c	A_arborescens	3	7	Golden	2	0.01
16_497b2c	A_arborescens	3	7	Golden	1	0.01
16_497b2c	A_arborescens	3	7	Golden	0	0
16_497b2c	A_arborescens	2	10	Gala	6	0.4
16_497b2c	A_arborescens	2	10	Gala	6	0.05
16_497b2c	A_arborescens	2	10	Gala	6	0.3
16_497b2c	A_arborescens	2	10	Gala	6	0.35
16_497b2c	A_arborescens	2	10	Gala	6	0.3
16_497b2c	A_arborescens	3	10	Gala	6	0.25
16_497b2c	A_arborescens	3	10	Gala	6	0.35
16_497b2c	A_arborescens	3	10	Gala	6	0.3
16_497b2c	A_arborescens	3	10	Gala	4	0.01
16_497b2c	A_arborescens	3	10	Gala	3	0.01
16_497b2c	A_arborescens	2	10	Golden	6	0.8
16_497b2c	A_arborescens	2	10	Golden	6	0.1
16_497b2c	A_arborescens	2	10	Golden	4	0.1
16_497b2c	A_arborescens	2	10	Golden	6	0.95
16_497b2c	A_arborescens	2	10	Golden	6	0.2
16_497b2c	A_arborescens	3	10	Golden	5	0.05
16_497b2c	A_arborescens	3	10	Golden	4	0.05
16_497b2c	A_arborescens	3	10	Golden	5	0.01
16_497b2c	A_arborescens	3	10	Golden	4	0.1
16_497b2c	A_arborescens	3	10	Golden	1	0.01
16_497bay	A_arborescens	1	4	Gala	3	0.01
16_497bay	A_arborescens	1	4	Gala	6	0.1
16_497bay	A_arborescens	1	4	Gala	5	0.01
16_497bay	A_arborescens	1	4	Gala	2	0.01
16_497bay	A_arborescens	1	4	Gala	6	0.1
16_497bay	A_arborescens	1	4	Golden	6	0.05
16_497bay	A_arborescens	1	4	Golden	6	0.01
16_497bay	A_arborescens	1	4	Golden	2	0.01
16_497bay	A_arborescens	1	4	Golden	6	0.1
16_497bay	A_arborescens	1	4	Golden	6	0.1
16_497bay	A_arborescens	1	7	Gala	5	0.01
16_497bay	A_arborescens	1	7	Gala	6	0.15
16_497bay	A_arborescens	1	7	Gala	6	0.01
16_497bay	A_arborescens	1	7	Gala	6	0.05
16_497bay	A_arborescens	1	7	Gala	6	0.2
16_497bay	A_arborescens	3	7	Gala	0	0
16_497bay	A_arborescens	3	7	Gala	2	0.01
16_497bay	A_arborescens	1	7	Golden	6	0.15
16_497bay	A_arborescens	1	7	Golden	6	0.1
16_497bay	A_arborescens	1	7	Golden	6	0.15
16_497bay	A_arborescens	1	7	Golden	6	0.1
16_497bay	A_arborescens	3	7	Golden	4	0.01
16_497bay	A_arborescens	3	7	Golden	6	0.05
16_497bay	A_arborescens	3	7	Golden	0	0
16_497bay	A_arborescens	1	10	Gala	5	0.01
16_497bay	A_arborescens	1	10	Gala	6	0.7
16_497bay	A_arborescens	1	10	Gala	4	0.01
16_497bay	A_arborescens	1	10	Gala	6	0.15
16_497bay	A_arborescens	1	10	Gala	6	0.9
16_497bay	A_arborescens	3	10	Gala	0	0
16_497bay	A_arborescens	3	10	Gala	2	0.01
16_497bay	A_arborescens	3	10	Gala	0	0
16_497bay	A_arborescens	3	10	Gala	0	0
16_497bay	A_arborescens	1	10	Golden	6	0.95
16_497bay	A_arborescens	1	10	Golden	6	0.4
16_497bay	A_arborescens	1	10	Golden	6	0.15
16_497bay	A_arborescens	1	10	Golden	6	0.3
16_497bay	A_arborescens	1	10	Golden	6	0.25
16_497bay	A_arborescens	3	10	Golden	6	0.3
16_497bay	A_arborescens	3	10	Golden	6	0.4
16_497bay	A_arborescens	3	10	Golden	0	0
16_497bay	A_arborescens	3	10	Golden	6	0.05
16_497bay	A_arborescens	3	10	Golden	4	0.01
17_294a3	A_arborescens	2	4	Gala	1	0.01
17_294a3	A_arborescens	2	4	Gala	3	0.01
17_294a3	A_arborescens	2	4	Gala	2	0.01
17_294a3	A_arborescens	2	4	Gala	0	0
17_294a3	A_arborescens	2	4	Gala	5	0.01
17_294a3	A_arborescens	3	4	Gala	0	0
17_294a3	A_arborescens	3	4	Gala	2	0.01
17_294a3	A_arborescens	2	4	Golden	0	0
17_294a3	A_arborescens	2	4	Golden	5	0.05
17_294a3	A_arborescens	2	4	Golden	2	0.01
17_294a3	A_arborescens	2	4	Golden	5	0.01
17_294a3	A_arborescens	2	4	Golden	4	0.01
17_294a3	A_arborescens	3	4	Golden	3	0.01
17_294a3	A_arborescens	3	4	Golden	6	0.1
17_294a3	A_arborescens	3	4	Golden	5	0.01
17_294a3	A_arborescens	2	7	Gala	0	0
17_294a3	A_arborescens	2	7	Gala	6	0.1
17_294a3	A_arborescens	2	7	Gala	4	0.01
17_294a3	A_arborescens	2	7	Gala	4	0.01
17_294a3	A_arborescens	2	7	Gala	6	0.1
17_294a3	A_arborescens	3	7	Gala	3	0.01
17_294a3	A_arborescens	3	7	Gala	5	0.01
17_294a3	A_arborescens	3	7	Gala	4	0.01
17_294a3	A_arborescens	3	7	Gala	2	0.01
17_294a3	A_arborescens	3	7	Gala	3	0.01
17_294a3	A_arborescens	2	7	Golden	5	0.1
17_294a3	A_arborescens	2	7	Golden	6	0.4
17_294a3	A_arborescens	2	7	Golden	2	0.01
17_294a3	A_arborescens	2	7	Golden	6	0.1
17_294a3	A_arborescens	2	7	Golden	6	0.15
17_294a3	A_arborescens	3	7	Golden	3	0.05
17_294a3	A_arborescens	3	7	Golden	6	0.1
17_294a3	A_arborescens	3	7	Golden	0	0
17_294a3	A_arborescens	3	7	Golden	0	0
17_294a3	A_arborescens	3	7	Golden	3	0.05
17_294a3	A_arborescens	2	10	Gala	1	0.01
17_294a3	A_arborescens	2	10	Gala	6	0.6
17_294a3	A_arborescens	2	10	Gala	4	0.2
17_294a3	A_arborescens	2	10	Gala	6	0.1
17_294a3	A_arborescens	2	10	Gala	6	0.7
17_294a3	A_arborescens	3	10	Gala	3	0.01
17_294a3	A_arborescens	3	10	Gala	6	0.05
17_294a3	A_arborescens	3	10	Gala	6	0.01
17_294a3	A_arborescens	3	10	Gala	3	0.01
17_294a3	A_arborescens	3	10	Gala	4	0.01
17_294a3	A_arborescens	2	10	Golden	6	0.7
17_294a3	A_arborescens	2	10	Golden	6	0.9
17_294a3	A_arborescens	2	10	Golden	4	0.01
17_294a3	A_arborescens	2	10	Golden	6	0.3
17_294a3	A_arborescens	2	10	Golden	6	0.4
17_294a3	A_arborescens	3	10	Golden	6	0.3
17_294a3	A_arborescens	3	10	Golden	6	0.45
17_294a3	A_arborescens	3	10	Golden	4	0.01
17_294a3	A_arborescens	3	10	Golden	6	0.2
17_294b3	A_arborescens	2	4	Gala	0	0
17_294b3	A_arborescens	2	4	Gala	3	0.01
17_294b3	A_arborescens	2	4	Gala	5	0.01
17_294b3	A_arborescens	2	4	Gala	5	0.01
17_294b3	A_arborescens	2	4	Gala	6	0.1
17_294b3	A_arborescens	2	4	Golden	3	0.01
17_294b3	A_arborescens	2	4	Golden	6	0.05
17_294b3	A_arborescens	2	4	Golden	6	0.05
17_294b3	A_arborescens	2	4	Golden	6	0.05
17_294b3	A_arborescens	2	4	Golden	4	0.01
17_294b3	A_arborescens	2	7	Gala	6	0.05
17_294b3	A_arborescens	2	7	Gala	6	0.1
17_294b3	A_arborescens	2	7	Gala	6	0.05
17_294b3	A_arborescens	2	7	Gala	6	0.1
17_294b3	A_arborescens	2	7	Gala	6	0.2
17_294b3	A_arborescens	3	7	Gala	1	0.01
17_294b3	A_arborescens	3	7	Gala	4	0.01
17_294b3	A_arborescens	2	7	Golden	6	0.1
17_294b3	A_arborescens	2	7	Golden	6	0.15
17_294b3	A_arborescens	2	7	Golden	6	0.1
17_294b3	A_arborescens	2	7	Golden	6	0.05
17_294b3	A_arborescens	2	7	Golden	6	0.2
17_294b3	A_arborescens	3	7	Golden	4	0.1
17_294b3	A_arborescens	3	7	Golden	6	0.05
17_294b3	A_arborescens	3	7	Golden	3	0.1
17_294b3	A_arborescens	2	10	Gala	6	0.4
17_294b3	A_arborescens	2	10	Gala	6	0.7
17_294b3	A_arborescens	2	10	Gala	6	0.1
17_294b3	A_arborescens	2	10	Gala	6	0.4
17_294b3	A_arborescens	2	10	Gala	6	1
17_294b3	A_arborescens	3	10	Gala	4	0.01
17_294b3	A_arborescens	3	10	Gala	6	0.01
17_294b3	A_arborescens	3	10	Gala	1	0.01
17_294b3	A_arborescens	3	10	Gala	1	0.01
17_294b3	A_arborescens	2	10	Golden	6	0.5
17_294b3	A_arborescens	2	10	Golden	6	0.5
17_294b3	A_arborescens	2	10	Golden	6	0.45
17_294b3	A_arborescens	2	10	Golden	6	0.1
17_294b3	A_arborescens	2	10	Golden	6	0.6
17_294b3	A_arborescens	3	10	Golden	6	0.5
17_294b3	A_arborescens	3	10	Golden	6	0.4
17_294b3	A_arborescens	3	10	Golden	4	0.25
17_294b3	A_arborescens	3	10	Golden	3	0.01
17_294b3	A_arborescens	3	10	Golden	6	0.15
Dalinette_5	A_arborescens	2	4	Gala	4	0.01
Dalinette_5	A_arborescens	2	4	Gala	3	0.01
Dalinette_5	A_arborescens	2	4	Gala	5	0.01
Dalinette_5	A_arborescens	2	4	Gala	4	0.01
Dalinette_5	A_arborescens	3	4	Gala	0	0
Dalinette_5	A_arborescens	3	4	Gala	1	0.01
Dalinette_5	A_arborescens	2	4	Golden	3	0.01
Dalinette_5	A_arborescens	2	4	Golden	3	0.01
Dalinette_5	A_arborescens	2	4	Golden	3	0.01
Dalinette_5	A_arborescens	3	4	Golden	2	0.01
Dalinette_5	A_arborescens	3	4	Golden	0	0
Dalinette_5	A_arborescens	3	4	Golden	1	0.01
Dalinette_5	A_arborescens	2	7	Gala	2	0.01
Dalinette_5	A_arborescens	2	7	Gala	3	0.01
Dalinette_5	A_arborescens	2	7	Gala	5	0.01
Dalinette_5	A_arborescens	2	7	Gala	6	0.01
Dalinette_5	A_arborescens	3	7	Gala	1	0.01
Dalinette_5	A_arborescens	3	7	Gala	6	0.01
Dalinette_5	A_arborescens	3	7	Gala	2	0.01
Dalinette_5	A_arborescens	3	7	Gala	5	0.01
Dalinette_5	A_arborescens	3	7	Gala	4	0.01
Dalinette_5	A_arborescens	2	7	Golden	6	0.05
Dalinette_5	A_arborescens	2	7	Golden	6	0.15
Dalinette_5	A_arborescens	2	7	Golden	6	0.5
Dalinette_5	A_arborescens	3	7	Golden	0	0
Dalinette_5	A_arborescens	3	7	Golden	4	0.01
Dalinette_5	A_arborescens	3	7	Golden	2	0.01
Dalinette_5	A_arborescens	3	7	Golden	6	0.05
Dalinette_5	A_arborescens	3	7	Golden	0	0
Dalinette_5	A_arborescens	2	10	Gala	3	0.01
Dalinette_5	A_arborescens	2	10	Gala	4	0.05
Dalinette_5	A_arborescens	2	10	Gala	4	0.05
Dalinette_5	A_arborescens	2	10	Gala	6	0.25
Dalinette_5	A_arborescens	3	10	Gala	3	0.05
Dalinette_5	A_arborescens	3	10	Gala	5	0.2
Dalinette_5	A_arborescens	3	10	Gala	2	0.01
Dalinette_5	A_arborescens	3	10	Gala	6	0.05
Dalinette_5	A_arborescens	3	10	Gala	2	0.01
Dalinette_5	A_arborescens	2	10	Golden	6	0.1
Dalinette_5	A_arborescens	2	10	Golden	6	0.7
Dalinette_5	A_arborescens	2	10	Golden	6	0.8
Dalinette_5	A_arborescens	3	10	Golden	6	0.25
Dalinette_5	A_arborescens	3	10	Golden	6	0.3
Dalinette_5	A_arborescens	3	10	Golden	6	0.35
Dalinette_5	A_arborescens	3	10	Golden	0	0
Dalinette_5	A_arborescens	3	10	Golden	3	0.01
Golden_2d	A_arborescens	2	4	Gala	0	0.05
Golden_2d	A_arborescens	2	4	Gala	5	0
Golden_2d	A_arborescens	2	4	Gala	0	0.01
Golden_2d	A_arborescens	2	4	Gala	1	0.01
Golden_2d	A_arborescens	2	4	Gala	0	0
Golden_2d	A_arborescens	2	4	Golden	4	0.05
Golden_2d	A_arborescens	2	4	Golden	3	0.01
Golden_2d	A_arborescens	2	4	Golden	6	0.1
Golden_2d	A_arborescens	2	4	Golden	3	0.01
Golden_2d	A_arborescens	2	4	Golden	3	0.01
Golden_2d	A_arborescens	2	7	Gala	4	0.01
Golden_2d	A_arborescens	2	7	Gala	4	0.01
Golden_2d	A_arborescens	2	7	Gala	1	0.01
Golden_2d	A_arborescens	2	7	Gala	1	0.01
Golden_2d	A_arborescens	2	7	Gala	6	0.15
Golden_2d	A_arborescens	3	7	Gala	6	0.1
Golden_2d	A_arborescens	3	7	Gala	3	0.01
Golden_2d	A_arborescens	2	7	Golden	6	0.2
Golden_2d	A_arborescens	2	7	Golden	6	0.2
Golden_2d	A_arborescens	2	7	Golden	6	0.3
Golden_2d	A_arborescens	2	7	Golden	6	0.15
Golden_2d	A_arborescens	2	7	Golden	6	0.15
Golden_2d	A_arborescens	3	7	Golden	6	0.15
Golden_2d	A_arborescens	3	7	Golden	4	0.01
Golden_2d	A_arborescens	3	7	Golden	3	0.01
Golden_2d	A_arborescens	2	10	Gala	4	0.2
Golden_2d	A_arborescens	2	10	Gala	5	0.01
Golden_2d	A_arborescens	2	10	Gala	5	0.01
Golden_2d	A_arborescens	2	10	Gala	4	0.01
Golden_2d	A_arborescens	2	10	Gala	6	0.7
Golden_2d	A_arborescens	3	10	Gala	6	0.4
Golden_2d	A_arborescens	3	10	Gala	5	0.01
Golden_2d	A_arborescens	3	10	Gala	4	0.01
Golden_2d	A_arborescens	3	10	Gala	6	0.05
Golden_2d	A_arborescens	2	10	Golden	6	0.9
Golden_2d	A_arborescens	2	10	Golden	6	0.9
Golden_2d	A_arborescens	2	10	Golden	6	1
Golden_2d	A_arborescens	2	10	Golden	6	0.2
Golden_2d	A_arborescens	2	10	Golden	6	0.7
Golden_2d	A_arborescens	3	10	Golden	6	0.5
Golden_2d	A_arborescens	3	10	Golden	6	0.05
Golden_2d	A_arborescens	3	10	Golden	2	0.05
Golden_2d	A_arborescens	3	10	Golden	4	0.01
Golden_2d	A_arborescens	3	10	Golden	4	0.01
Golden2b	A_arborescens	2	4	Gala	6	0.05
Golden2b	A_arborescens	2	4	Gala	0	0
Golden2b	A_arborescens	2	4	Gala	4	0.01
Golden2b	A_arborescens	2	4	Gala	2	0.01
Golden2b	A_arborescens	2	4	Gala	0	0
Golden2b	A_arborescens	2	4	Golden	1	0.01
Golden2b	A_arborescens	2	4	Golden	4	0.01
Golden2b	A_arborescens	2	4	Golden	1	0.01
Golden2b	A_arborescens	2	4	Golden	1	0.01
Golden2b	A_arborescens	2	4	Golden	5	0.01
Golden2b	A_arborescens	2	7	Gala	6	0.15
Golden2b	A_arborescens	2	7	Gala	0	0
Golden2b	A_arborescens	2	7	Gala	6	0.2
Golden2b	A_arborescens	2	7	Gala	1	0.01
Golden2b	A_arborescens	2	7	Gala	6	0.1
Golden2b	A_arborescens	3	7	Gala	6	0.15
Golden2b	A_arborescens	3	7	Gala	4	0.05
Golden2b	A_arborescens	2	7	Golden	6	0.1
Golden2b	A_arborescens	2	7	Golden	6	0.2
Golden2b	A_arborescens	2	7	Golden	6	0.1
Golden2b	A_arborescens	2	7	Golden	6	0.05
Golden2b	A_arborescens	2	7	Golden	6	0.1
Golden2b	A_arborescens	3	7	Golden	3	0.01
Golden2b	A_arborescens	3	7	Golden	4	0.01
Golden2b	A_arborescens	3	7	Golden	0	0
Golden2b	A_arborescens	2	10	Gala	6	0.35
Golden2b	A_arborescens	2	10	Gala	2	0.01
Golden2b	A_arborescens	2	10	Gala	6	0.8
Golden2b	A_arborescens	2	10	Gala	5	0.2
Golden2b	A_arborescens	2	10	Gala	6	0.5
Golden2b	A_arborescens	3	10	Gala	6	0.45
Golden2b	A_arborescens	3	10	Gala	6	0.35
Golden2b	A_arborescens	3	10	Gala	2	0.01
Golden2b	A_arborescens	3	10	Gala	2	0.01
Golden2b	A_arborescens	2	10	Golden	6	0.3
Golden2b	A_arborescens	2	10	Golden	6	0.8
Golden2b	A_arborescens	2	10	Golden	6	0.5
Golden2b	A_arborescens	2	10	Golden	6	0.1
Golden2b	A_arborescens	2	10	Golden	5	0.2
Golden2b	A_arborescens	3	10	Golden	4	0.01
Golden2b	A_arborescens	3	10	Golden	6	0.01
Golden2b	A_arborescens	3	10	Golden	2	0.01
Golden2b	A_arborescens	3	10	Golden	2	0.01
Golden3b	A_arborescens	2	4	Gala	0	0
Golden3b	A_arborescens	2	4	Gala	0	0
Golden3b	A_arborescens	2	4	Gala	0	0
Golden3b	A_arborescens	2	4	Gala	0	0
Golden3b	A_arborescens	2	4	Gala	2	0.01
Golden3b	A_arborescens	2	4	Golden	4	0.01
Golden3b	A_arborescens	2	4	Golden	3	0.01
Golden3b	A_arborescens	2	4	Golden	6	0.1
Golden3b	A_arborescens	2	4	Golden	2	0.01
Golden3b	A_arborescens	2	4	Golden	4	0.01
Golden3b	A_arborescens	2	7	Gala	1	0.01
Golden3b	A_arborescens	2	7	Gala	5	0.05
Golden3b	A_arborescens	2	7	Gala	0	0
Golden3b	A_arborescens	2	7	Gala	0	0
Golden3b	A_arborescens	2	7	Gala	6	0.15
Golden3b	A_arborescens	3	7	Gala	6	0.2
Golden3b	A_arborescens	3	7	Gala	2	0.01
Golden3b	A_arborescens	2	7	Golden	6	0.2
Golden3b	A_arborescens	2	7	Golden	6	0.25
Golden3b	A_arborescens	2	7	Golden	6	0.3
Golden3b	A_arborescens	2	7	Golden	5	0.1
Golden3b	A_arborescens	2	7	Golden	6	0.15
Golden3b	A_arborescens	3	7	Golden	6	0.05
Golden3b	A_arborescens	3	7	Golden	4	0.01
Golden3b	A_arborescens	3	7	Golden	5	0.01
Golden3b	A_arborescens	2	10	Gala	1	0.01
Golden3b	A_arborescens	2	10	Gala	6	0.5
Golden3b	A_arborescens	2	10	Gala	0	0
Golden3b	A_arborescens	2	10	Gala	0	0
Golden3b	A_arborescens	2	10	Gala	6	0.9
Golden3b	A_arborescens	3	10	Gala	6	0.6
Golden3b	A_arborescens	3	10	Gala	5	0.25
Golden3b	A_arborescens	3	10	Gala	5	0.01
Golden3b	A_arborescens	3	10	Gala	1	0.01
Golden3b	A_arborescens	2	10	Golden	6	0.7
Golden3b	A_arborescens	2	10	Golden	6	0.8
Golden3b	A_arborescens	2	10	Golden	6	0.8
Golden3b	A_arborescens	2	10	Golden	6	0.2
Golden3b	A_arborescens	2	10	Golden	6	0.6
Golden3b	A_arborescens	3	10	Golden	6	0.2
Golden3b	A_arborescens	3	10	Golden	4	0.01
Golden3b	A_arborescens	3	10	Golden	2	0.01
Golden3b	A_arborescens	3	10	Golden	2	0.01
Golden3b	A_arborescens	3	10	Golden	6	0.01
LSVM1443	A_arborescens	1	4	Gala	4	0.05
LSVM1443	A_arborescens	1	4	Gala	5	0.01
LSVM1443	A_arborescens	1	4	Gala	5	0
LSVM1443	A_arborescens	1	4	Gala	5	0.05
LSVM1443	A_arborescens	3	4	Gala	4	0.01
LSVM1443	A_arborescens	3	4	Gala	0	0
LSVM1443	A_arborescens	3	4	Gala	0	0
LSVM1443	A_arborescens	3	4	Gala	0	0
LSVM1443	A_arborescens	1	4	Golden	6	0.1
LSVM1443	A_arborescens	1	4	Golden	6	0.05
LSVM1443	A_arborescens	1	4	Golden	5	0.1
LSVM1443	A_arborescens	1	4	Golden	6	0.25
LSVM1443	A_arborescens	1	4	Golden	5	0.1
LSVM1443	A_arborescens	3	4	Golden	2	0.01
LSVM1443	A_arborescens	3	4	Golden	6	0.01
LSVM1443	A_arborescens	3	4	Golden	2	0.01
LSVM1443	A_arborescens	1	7	Gala	5	0.05
LSVM1443	A_arborescens	1	7	Gala	4	0.01
LSVM1443	A_arborescens	1	7	Gala	6	0.05
LSVM1443	A_arborescens	1	7	Gala	4	0.05
LSVM1443	A_arborescens	3	7	Gala	5	0.05
LSVM1443	A_arborescens	3	7	Gala	5	0.05
LSVM1443	A_arborescens	3	7	Gala	6	0.01
LSVM1443	A_arborescens	3	7	Gala	2	0.01
LSVM1443	A_arborescens	3	7	Gala	0	0
LSVM1443	A_arborescens	1	7	Golden	6	0.5
LSVM1443	A_arborescens	1	7	Golden	6	0.2
LSVM1443	A_arborescens	1	7	Golden	6	0.1
LSVM1443	A_arborescens	1	7	Golden	6	0.5
LSVM1443	A_arborescens	1	7	Golden	5	0.15
LSVM1443	A_arborescens	3	7	Golden	3	0.05
LSVM1443	A_arborescens	3	7	Golden	1	0.01
LSVM1443	A_arborescens	3	7	Golden	6	0.01
LSVM1443	A_arborescens	3	7	Golden	4	0.01
LSVM1443	A_arborescens	3	7	Golden	4	0.01
LSVM1443	A_arborescens	1	10	Gala	6	0.05
LSVM1443	A_arborescens	1	10	Gala	4	0.01
LSVM1443	A_arborescens	1	10	Gala	6	0.05
LSVM1443	A_arborescens	1	10	Gala	4	0.05
LSVM1443	A_arborescens	3	10	Gala	6	0.2
LSVM1443	A_arborescens	3	10	Gala	5	0.1
LSVM1443	A_arborescens	3	10	Gala	6	0.15
LSVM1443	A_arborescens	3	10	Gala	0	0
LSVM1443	A_arborescens	3	10	Gala	0	0
LSVM1443	A_arborescens	1	10	Golden	6	0.95
LSVM1443	A_arborescens	1	10	Golden	6	0.15
LSVM1443	A_arborescens	1	10	Golden	6	0.1
LSVM1443	A_arborescens	1	10	Golden	6	0.95
LSVM1443	A_arborescens	1	10	Golden	6	0.4
LSVM1443	A_arborescens	3	10	Golden	6	0.35
LSVM1443	A_arborescens	3	10	Golden	6	0.01
LSVM1443	A_arborescens	3	10	Golden	6	0.1
LSVM1443	A_arborescens	3	10	Golden	6	0.25
LSVM1443	A_arborescens	3	10	Golden	3	0.01
LSVM1451	A_arborescens	2	4	Gala	6	0.2
LSVM1451	A_arborescens	2	4	Gala	4	0.01
LSVM1451	A_arborescens	2	4	Gala	0	0
LSVM1451	A_arborescens	2	4	Gala	0	0
LSVM1451	A_arborescens	2	4	Gala	4	0.01
LSVM1451	A_arborescens	3	4	Gala	4	0.01
LSVM1451	A_arborescens	3	4	Gala	0	0
LSVM1451	A_arborescens	2	4	Golden	1	0.01
LSVM1451	A_arborescens	2	4	Golden	6	0.05
LSVM1451	A_arborescens	2	4	Golden	1	0.01
LSVM1451	A_arborescens	2	4	Golden	6	0.1
LSVM1451	A_arborescens	2	4	Golden	3	0.01
LSVM1451	A_arborescens	3	4	Golden	4	0.05
LSVM1451	A_arborescens	3	4	Golden	6	0.1
LSVM1451	A_arborescens	3	4	Golden	6	0.2
LSVM1451	A_arborescens	2	7	Gala	6	0.3
LSVM1451	A_arborescens	2	7	Gala	6	0.1
LSVM1451	A_arborescens	2	7	Gala	6	0.05
LSVM1451	A_arborescens	2	7	Gala	6	0.05
LSVM1451	A_arborescens	2	7	Gala	4	0.01
LSVM1451	A_arborescens	3	7	Gala	0	0
LSVM1451	A_arborescens	3	7	Gala	3	0.01
LSVM1451	A_arborescens	3	7	Gala	6	0.1
LSVM1451	A_arborescens	3	7	Gala	3	0.01
LSVM1451	A_arborescens	3	7	Gala	5	0.01
LSVM1451	A_arborescens	2	7	Golden	6	0.1
LSVM1451	A_arborescens	2	7	Golden	6	0.3
LSVM1451	A_arborescens	2	7	Golden	4	0.05
LSVM1451	A_arborescens	2	7	Golden	6	0.3
LSVM1451	A_arborescens	2	7	Golden	6	0.1
LSVM1451	A_arborescens	3	7	Golden	6	0.15
LSVM1451	A_arborescens	3	7	Golden	6	0.35
LSVM1451	A_arborescens	3	7	Golden	5	0.01
LSVM1451	A_arborescens	3	7	Golden	5	0.01
LSVM1451	A_arborescens	3	7	Golden	6	0.4
LSVM1451	A_arborescens	2	10	Gala	6	0.95
LSVM1451	A_arborescens	2	10	Gala	6	0.2
LSVM1451	A_arborescens	2	10	Gala	6	0.25
LSVM1451	A_arborescens	2	10	Gala	6	0.4
LSVM1451	A_arborescens	2	10	Gala	6	0.15
LSVM1451	A_arborescens	3	10	Gala	5	0.01
LSVM1451	A_arborescens	3	10	Gala	6	0.01
LSVM1451	A_arborescens	3	10	Gala	6	0.01
LSVM1451	A_arborescens	3	10	Gala	6	0.1
LSVM1451	A_arborescens	3	10	Gala	6	0.25
LSVM1451	A_arborescens	2	10	Golden	6	0.5
LSVM1451	A_arborescens	2	10	Golden	6	0.7
LSVM1451	A_arborescens	2	10	Golden	6	0.3
LSVM1451	A_arborescens	2	10	Golden	6	0.8
LSVM1451	A_arborescens	2	10	Golden	6	0.5
LSVM1451	A_arborescens	3	10	Golden	6	0.5
LSVM1451	A_arborescens	3	10	Golden	6	1
LSVM1451	A_arborescens	3	10	Golden	6	0.25
LSVM1451	A_arborescens	3	10	Golden	6	0.15
LSVM1451	A_arborescens	3	10	Golden	6	0.95
LSVM1459	A_arborescens	1	4	Gala	0	0
LSVM1459	A_arborescens	1	4	Gala	6	0.01
LSVM1459	A_arborescens	1	4	Gala	5	0.1
LSVM1459	A_arborescens	1	4	Gala	6	0.15
LSVM1459	A_arborescens	1	4	Gala	6	0.15
LSVM1459	A_arborescens	3	4	Gala	0	0
LSVM1459	A_arborescens	3	4	Gala	0	0
LSVM1459	A_arborescens	3	4	Gala	0	0
LSVM1459	A_arborescens	1	4	Golden	6	0.1
LSVM1459	A_arborescens	1	4	Golden	6	0.1
LSVM1459	A_arborescens	1	4	Golden	6	0.15
LSVM1459	A_arborescens	1	4	Golden	6	0.1
LSVM1459	A_arborescens	1	4	Golden	6	0.1
LSVM1459	A_arborescens	3	4	Golden	3	0.01
LSVM1459	A_arborescens	3	4	Golden	2	0.01
LSVM1459	A_arborescens	3	4	Golden	3	0.01
LSVM1459	A_arborescens	3	4	Golden	3	0.01
LSVM1459	A_arborescens	1	7	Gala	0	0
LSVM1459	A_arborescens	1	7	Gala	6	0.01
LSVM1459	A_arborescens	1	7	Gala	6	0.25
LSVM1459	A_arborescens	1	7	Gala	6	0.2
LSVM1459	A_arborescens	1	7	Gala	6	0.3
LSVM1459	A_arborescens	3	7	Gala	6	0.05
LSVM1459	A_arborescens	3	7	Gala	1	0.01
LSVM1459	A_arborescens	3	7	Gala	5	0.1
LSVM1459	A_arborescens	3	7	Gala	5	0.05
LSVM1459	A_arborescens	3	7	Gala	3	0.01
LSVM1459	A_arborescens	1	7	Golden	6	0.1
LSVM1459	A_arborescens	1	7	Golden	6	0.2
LSVM1459	A_arborescens	1	7	Golden	6	0.25
LSVM1459	A_arborescens	1	7	Golden	6	0.2
LSVM1459	A_arborescens	1	7	Golden	6	0.15
LSVM1459	A_arborescens	3	7	Golden	1	0.01
LSVM1459	A_arborescens	3	7	Golden	1	0.01
LSVM1459	A_arborescens	3	7	Golden	1	0.01
LSVM1459	A_arborescens	3	7	Golden	4	0.01
LSVM1459	A_arborescens	3	7	Golden	2	0.01
LSVM1459	A_arborescens	1	10	Gala	0	0
LSVM1459	A_arborescens	1	10	Gala	6	0.05
LSVM1459	A_arborescens	1	10	Gala	6	0.3
LSVM1459	A_arborescens	1	10	Gala	6	0.3
LSVM1459	A_arborescens	1	10	Gala	6	0.6
LSVM1459	A_arborescens	3	10	Gala	6	0.75
LSVM1459	A_arborescens	3	10	Gala	6	0.1
LSVM1459	A_arborescens	3	10	Gala	6	0.45
LSVM1459	A_arborescens	3	10	Gala	6	0.35
LSVM1459	A_arborescens	3	10	Gala	2	0.01
LSVM1459	A_arborescens	1	10	Golden	6	0.4
LSVM1459	A_arborescens	1	10	Golden	6	0.5
LSVM1459	A_arborescens	1	10	Golden	6	0.6
LSVM1459	A_arborescens	1	10	Golden	6	0.6
LSVM1459	A_arborescens	1	10	Golden	6	0.5
LSVM1459	A_arborescens	3	10	Golden	6	0.01
LSVM1459	A_arborescens	3	10	Golden	4	0.05
LSVM1459	A_arborescens	3	10	Golden	4	0.01
LSVM1459	A_arborescens	3	10	Golden	5	0.01
LSVM1459	A_arborescens	3	10	Golden	1	0.01
Reinette_13	A_arborescens	2	4	Gala	5	0.01
Reinette_13	A_arborescens	2	4	Gala	1	0.01
Reinette_13	A_arborescens	2	4	Gala	4	0.01
Reinette_13	A_arborescens	2	4	Gala	0	0
Reinette_13	A_arborescens	2	4	Gala	5	0.01
Reinette_13	A_arborescens	3	4	Gala	4	0.05
Reinette_13	A_arborescens	3	4	Gala	0	0
Reinette_13	A_arborescens	3	4	Gala	0	0
Reinette_13	A_arborescens	3	4	Gala	0	0
Reinette_13	A_arborescens	2	4	Golden	4	0.01
Reinette_13	A_arborescens	2	4	Golden	5	0.05
Reinette_13	A_arborescens	2	4	Golden	2	0.01
Reinette_13	A_arborescens	3	4	Golden	3	0.01
Reinette_13	A_arborescens	3	4	Golden	3	0.01
Reinette_13	A_arborescens	3	4	Golden	0	0
Reinette_13	A_arborescens	3	4	Golden	1	0.01
Reinette_13	A_arborescens	2	7	Gala	0	0
Reinette_13	A_arborescens	2	7	Gala	5	0.05
Reinette_13	A_arborescens	2	7	Gala	5	0.05
Reinette_13	A_arborescens	3	7	Gala	6	0.3
Reinette_13	A_arborescens	3	7	Gala	2	0.01
Reinette_13	A_arborescens	3	7	Gala	6	0.2
Reinette_13	A_arborescens	3	7	Gala	4	0.01
Reinette_13	A_arborescens	3	7	Gala	1	0.01
Reinette_13	A_arborescens	2	7	Golden	5	0.05
Reinette_13	A_arborescens	2	7	Golden	5	0.1
Reinette_13	A_arborescens	2	7	Golden	2	0.01
Reinette_13	A_arborescens	3	7	Golden	1	0.01
Reinette_13	A_arborescens	3	7	Golden	3	0.01
Reinette_13	A_arborescens	3	7	Golden	3	0.01
Reinette_13	A_arborescens	3	7	Golden	3	0.01
Reinette_13	A_arborescens	3	7	Golden	2	0.01
Reinette_13	A_arborescens	2	10	Gala	0	0
Reinette_13	A_arborescens	2	10	Gala	5	0.1
Reinette_13	A_arborescens	3	10	Gala	1	0.01
Reinette_13	A_arborescens	3	10	Gala	6	0.6
Reinette_13	A_arborescens	3	10	Gala	1	0.01
Reinette_13	A_arborescens	3	10	Gala	6	0.7
Reinette_13	A_arborescens	3	10	Gala	3	0.01
Reinette_13	A_arborescens	2	10	Golden	5	0.2
Reinette_13	A_arborescens	2	10	Golden	5	0.3
Reinette_13	A_arborescens	2	10	Golden	5	0.1
Reinette_13	A_arborescens	3	10	Golden	2	0.01
Reinette_13	A_arborescens	3	10	Golden	4	0.01
Reinette_13	A_arborescens	3	10	Golden	5	0.05
Reinette_13	A_arborescens	3	10	Golden	3	0.05
Reinette_13	A_arborescens	3	10	Golden	3	0.01
RGR97_0016	A_arborescens	2	4	Gala	0	0
RGR97_0016	A_arborescens	2	4	Gala	2	0.01
RGR97_0016	A_arborescens	2	4	Gala	0	0
RGR97_0016	A_arborescens	2	4	Gala	1	0.01
RGR97_0016	A_arborescens	3	4	Gala	0	0
RGR97_0016	A_arborescens	3	4	Gala	3	0.01
RGR97_0016	A_arborescens	2	4	Golden	1	0.01
RGR97_0016	A_arborescens	2	4	Golden	2	0.01
RGR97_0016	A_arborescens	2	4	Golden	2	0.01
RGR97_0016	A_arborescens	2	4	Golden	0	0
RGR97_0016	A_arborescens	3	4	Golden	0	0
RGR97_0016	A_arborescens	3	4	Golden	0	0.01
RGR97_0016	A_arborescens	3	4	Golden	2	0.01
RGR97_0016	A_arborescens	3	4	Golden	1	0.01
RGR97_0016	A_arborescens	2	7	Gala	0	0
RGR97_0016	A_arborescens	2	7	Gala	0	0
RGR97_0016	A_arborescens	2	7	Gala	6	0.05
RGR97_0016	A_arborescens	2	7	Gala	5	0.1
RGR97_0016	A_arborescens	3	7	Gala	0	0
RGR97_0016	A_arborescens	3	7	Gala	5	0.1
RGR97_0016	A_arborescens	3	7	Gala	1	0.01
RGR97_0016	A_arborescens	3	7	Gala	3	0.01
RGR97_0016	A_arborescens	2	7	Golden	4	0.01
RGR97_0016	A_arborescens	2	7	Golden	4	0.01
RGR97_0016	A_arborescens	2	7	Golden	1	0.01
RGR97_0016	A_arborescens	3	7	Golden	1	0.01
RGR97_0016	A_arborescens	3	7	Golden	1	0.01
RGR97_0016	A_arborescens	3	7	Golden	1	0.01
RGR97_0016	A_arborescens	3	7	Golden	2	0.01
RGR97_0016	A_arborescens	3	7	Golden	2	0.01
RGR97_0016	A_arborescens	2	10	Gala	0	0
RGR97_0016	A_arborescens	2	10	Gala	5	0.15
RGR97_0016	A_arborescens	2	10	Gala	5	0.2
RGR97_0016	A_arborescens	2	10	Gala	6	0.5
RGR97_0016	A_arborescens	3	10	Gala	6	0.85
RGR97_0016	A_arborescens	3	10	Gala	6	0.2
RGR97_0016	A_arborescens	3	10	Gala	6	0.4
RGR97_0016	A_arborescens	3	10	Gala	6	0.15
RGR97_0016	A_arborescens	3	10	Gala	0	0
RGR97_0016	A_arborescens	2	10	Golden	6	0.05
RGR97_0016	A_arborescens	2	10	Golden	5	0.05
RGR97_0016	A_arborescens	2	10	Golden	1	0.01
RGR97_0016	A_arborescens	3	10	Golden	2	0.01
RGR97_0016	A_arborescens	3	10	Golden	6	0.01
RGR97_0016	A_arborescens	3	10	Golden	3	0.01
RGR97_0016	A_arborescens	3	10	Golden	4	0.01
RGR97_0016	A_arborescens	3	10	Golden	1	0.01
AB43	A_brassicicola	2	4	Gala	6	0.01
AB43	A_brassicicola	2	4	Gala	6	0.01
AB43	A_brassicicola	2	4	Gala	6	0.05
AB43	A_brassicicola	2	4	Gala	6	0.01
AB43	A_brassicicola	2	4	Gala	6	0.05
AB43	A_brassicicola	3	4	Gala	4	0.01
AB43	A_brassicicola	2	4	Golden	3	0.01
AB43	A_brassicicola	2	4	Golden	6	0.05
AB43	A_brassicicola	2	4	Golden	5	0.01
AB43	A_brassicicola	2	4	Golden	6	0.05
AB43	A_brassicicola	2	4	Golden	6	0.1
AB43	A_brassicicola	3	4	Golden	6	0.01
AB43	A_brassicicola	3	4	Golden	6	0.01
AB43	A_brassicicola	3	4	Golden	6	0.01
AB43	A_brassicicola	2	7	Gala	6	0.05
AB43	A_brassicicola	2	7	Gala	6	0.1
AB43	A_brassicicola	2	7	Gala	6	0.1
AB43	A_brassicicola	2	7	Gala	6	0.1
AB43	A_brassicicola	2	7	Gala	6	0.1
AB43	A_brassicicola	3	7	Gala	6	0.01
AB43	A_brassicicola	3	7	Gala	6	0.05
AB43	A_brassicicola	3	7	Gala	6	0.01
AB43	A_brassicicola	2	7	Golden	6	0.05
AB43	A_brassicicola	2	7	Golden	6	0.05
AB43	A_brassicicola	2	7	Golden	5	0.05
AB43	A_brassicicola	2	7	Golden	6	0.05
AB43	A_brassicicola	2	7	Golden	6	0.1
AB43	A_brassicicola	3	7	Golden	6	0.01
AB43	A_brassicicola	3	7	Golden	3	0.01
AB43	A_brassicicola	3	7	Golden	4	0.01
AB43	A_brassicicola	3	7	Golden	6	0.01
AB43	A_brassicicola	2	10	Gala	6	0.05
AB43	A_brassicicola	2	10	Gala	6	0.1
AB43	A_brassicicola	2	10	Gala	6	0.15
AB43	A_brassicicola	2	10	Gala	6	0.15
AB43	A_brassicicola	2	10	Gala	6	0.1
AB43	A_brassicicola	3	10	Gala	6	0.01
AB43	A_brassicicola	3	10	Gala	6	0.1
AB43	A_brassicicola	3	10	Gala	6	0.1
AB43	A_brassicicola	2	10	Golden	6	0.1
AB43	A_brassicicola	2	10	Golden	6	0.1
AB43	A_brassicicola	2	10	Golden	6	0.1
AB43	A_brassicicola	2	10	Golden	6	0.1
AB43	A_brassicicola	2	10	Golden	6	0.15
AB43	A_brassicicola	3	10	Golden	6	0.01
AB43	A_brassicicola	3	10	Golden	5	0.01
AB43	A_brassicicola	3	10	Golden	5	0.01
AB43	A_brassicicola	3	10	Golden	6	0.01
water control	water control	1	4	Gala	0	0
water control	water control	1	4	Gala	0	0
water control	water control	1	4	Gala	0	0
water control	water control	1	4	Gala	0	0
water control	water control	1	4	Gala	0	0
water control	water control	2	4	Gala	0	0
water control	water control	2	4	Gala	0	0
water control	water control	2	4	Gala	0	0
water control	water control	2	4	Gala	0	0
water control	water control	2	4	Gala	0	0
water control	water control	3	4	Gala	0	0
water control	water control	3	4	Gala	0	0
water control	water control	3	4	Gala	0	0
water control	water control	3	4	Gala	0	0
water control	water control	3	4	Gala	0	0
water control	water control	1	4	Golden	0	0
water control	water control	1	4	Golden	0	0
water control	water control	1	4	Golden	0	0
water control	water control	1	4	Golden	0	0
water control	water control	1	4	Golden	0	0
water control	water control	2	4	Golden	0	0
water control	water control	2	4	Golden	0	0
water control	water control	2	4	Golden	0	0
water control	water control	2	4	Golden	0	0
water control	water control	2	4	Golden	0	0
water control	water control	3	4	Golden	0	0
water control	water control	3	4	Golden	0	0
water control	water control	3	4	Golden	0	0
water control	water control	3	4	Golden	0	0
water control	water control	3	4	Golden	0	0
water control	water control	1	7	Gala	0	0
water control	water control	1	7	Gala	0	0
water control	water control	1	7	Gala	0	0
water control	water control	1	7	Gala	0	0
water control	water control	1	7	Gala	0	0
water control	water control	2	7	Gala	0	0
water control	water control	2	7	Gala	0	0
water control	water control	2	7	Gala	0	0
water control	water control	2	7	Gala	0	0
water control	water control	2	7	Gala	0	0
water control	water control	3	7	Gala	0	0
water control	water control	3	7	Gala	0	0
water control	water control	3	7	Gala	0	0
water control	water control	3	7	Gala	0	0
water control	water control	3	7	Gala	0	0
water control	water control	1	7	Golden	0	0
water control	water control	1	7	Golden	0	0
water control	water control	1	7	Golden	0	0
water control	water control	1	7	Golden	0	0
water control	water control	1	7	Golden	0	0
water control	water control	2	7	Golden	0	0
water control	water control	2	7	Golden	0	0
water control	water control	2	7	Golden	0	0
water control	water control	2	7	Golden	0	0
water control	water control	2	7	Golden	0	0
water control	water control	3	7	Golden	0	0
water control	water control	3	7	Golden	0	0
water control	water control	3	7	Golden	0	0
water control	water control	3	7	Golden	0	0
water control	water control	3	7	Golden	0	0
water control	water control	1	10	Gala	0	0
water control	water control	1	10	Gala	0	0
water control	water control	1	10	Gala	0	0
water control	water control	1	10	Gala	0	0
water control	water control	1	10	Gala	0	0
water control	water control	2	10	Gala	0	0
water control	water control	2	10	Gala	0	0
water control	water control	2	10	Gala	0	0
water control	water control	2	10	Gala	0	0
water control	water control	2	10	Gala	0	0
water control	water control	3	10	Gala	0	0
water control	water control	3	10	Gala	0	0
water control	water control	3	10	Gala	0	0
water control	water control	3	10	Gala	0	0
water control	water control	3	10	Gala	0	0
water control	water control	1	10	Golden	0	0
water control	water control	1	10	Golden	0	0
water control	water control	1	10	Golden	0	0
water control	water control	1	10	Golden	0	0
water control	water control	1	10	Golden	0	0
water control	water control	2	10	Golden	0	0
water control	water control	2	10	Golden	0	0
water control	water control	2	10	Golden	0	0
water control	water control	2	10	Golden	0	0
water control	water control	2	10	Golden	0	0
water control	water control	3	10	Golden	0	0
water control	water control	3	10	Golden	0	0
water control	water control	3	10	Golden	0	0
water control	water control	3	10	Golden	0	0
water control	water control	3	10	Golden	0	0
